# Supplementary material
Source: ML conference proceedings conference paper supplement (https://openreview.net/forum?id=N6ZYsmzMDQ)

# Model Performance Comparison - All Criteria

## Clarity of Steps

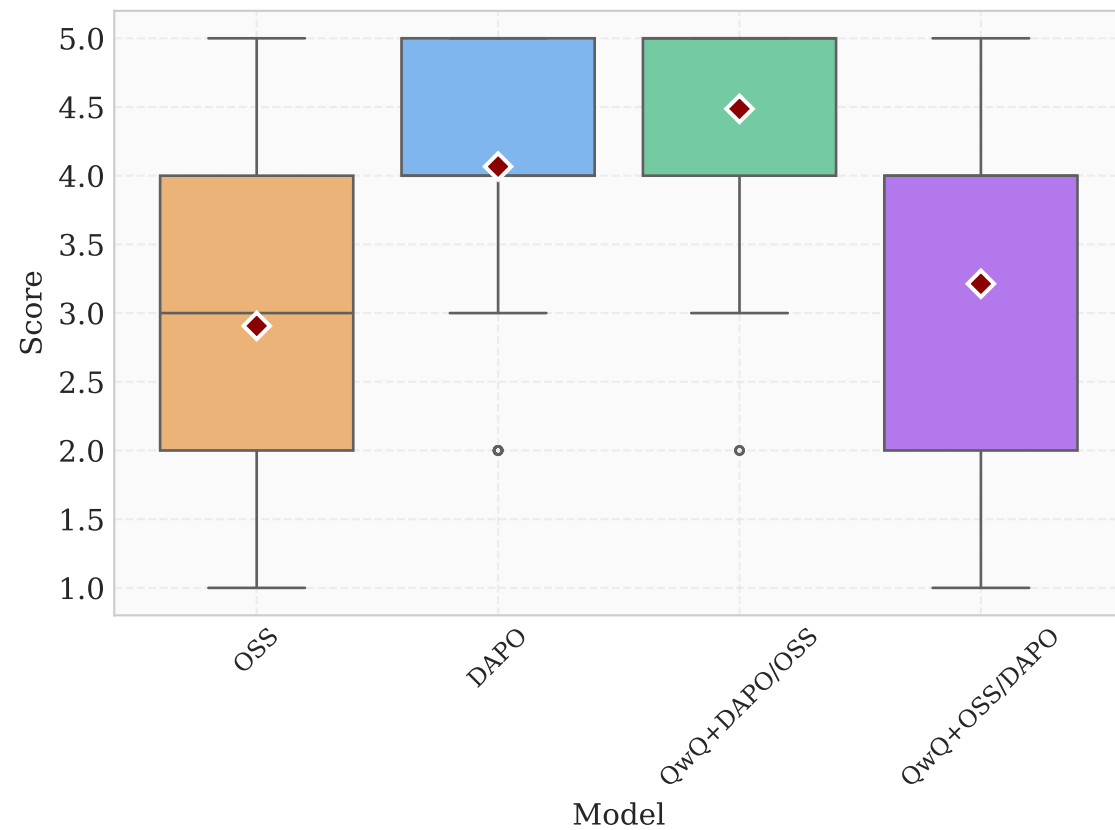

## Ease of Following

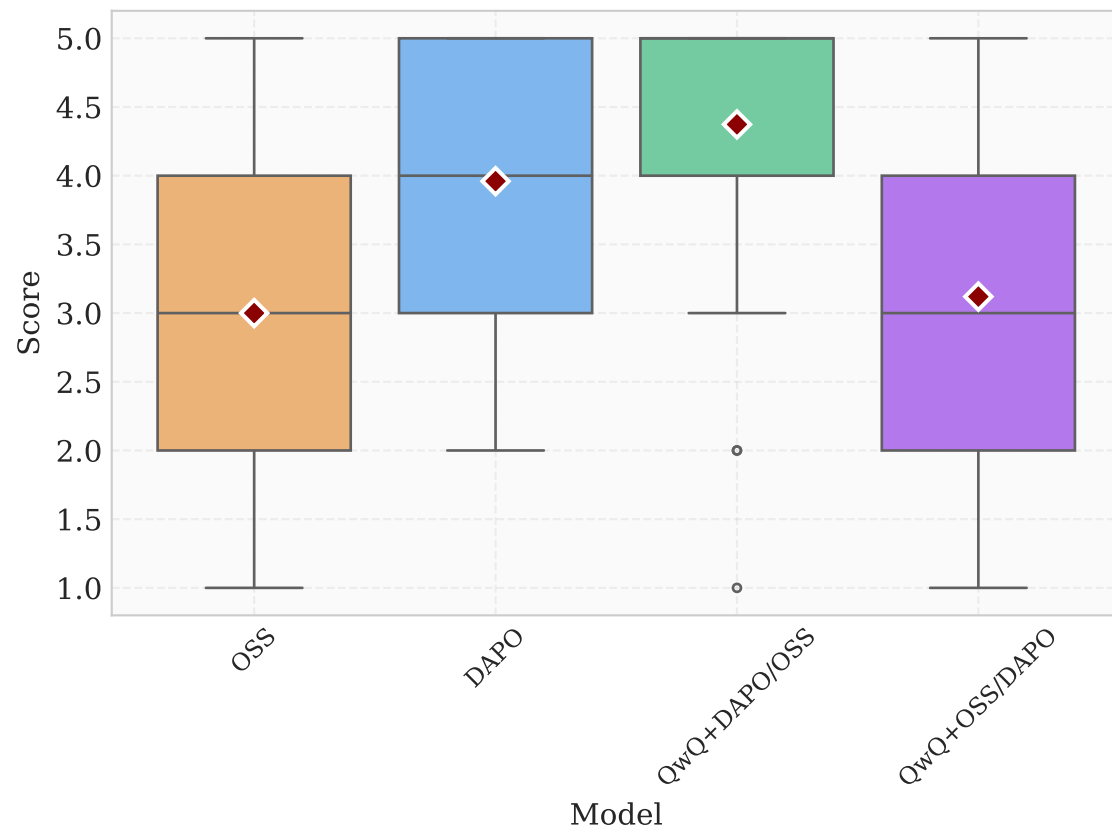

## Confidence

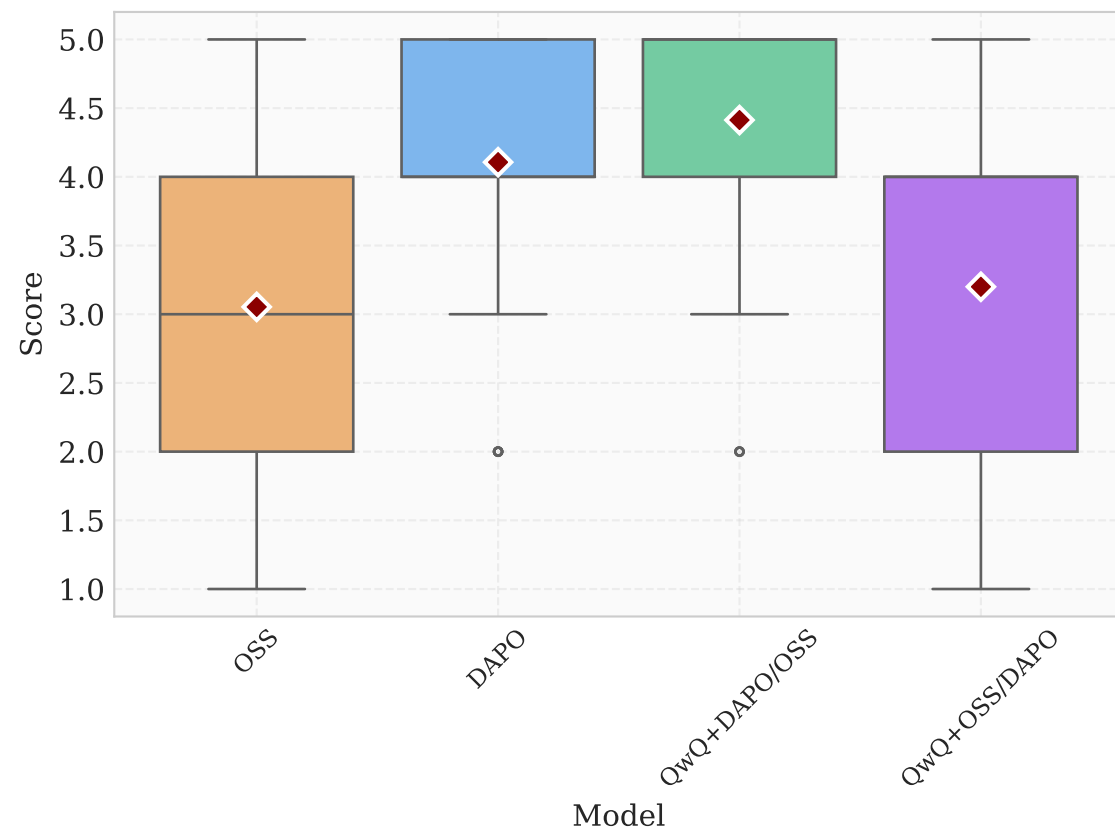

## Best Overall (Rank)

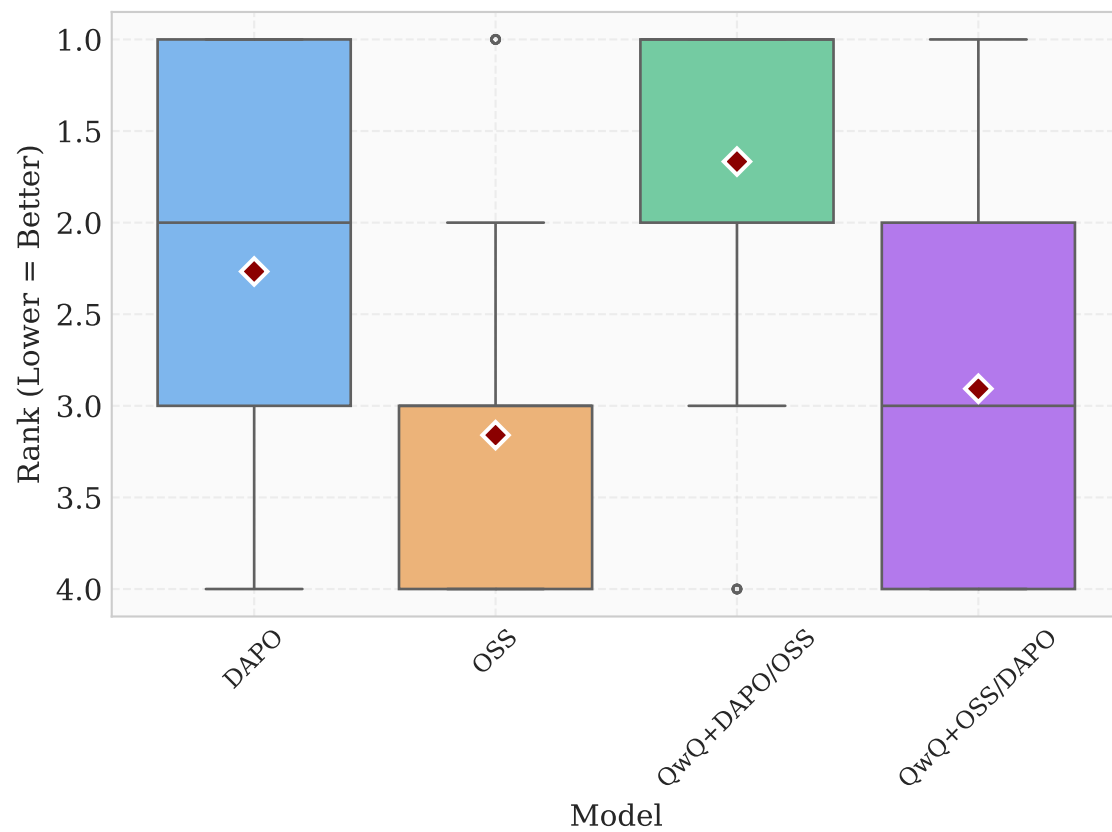

Supplement: supplementary_material [file boxplot_combined_all_rows-checkpoint.pdf › anon_code/evaluation/plots_user_study/.ipynb_checkpoints/boxplot_combined_all_rows-checkpoint.pdf]
