# Supplementary material
Source: ML conference proceedings conference paper supplement (https://openreview.net/forum?id=N6ZYsmzMDQ)

# Ease of Following

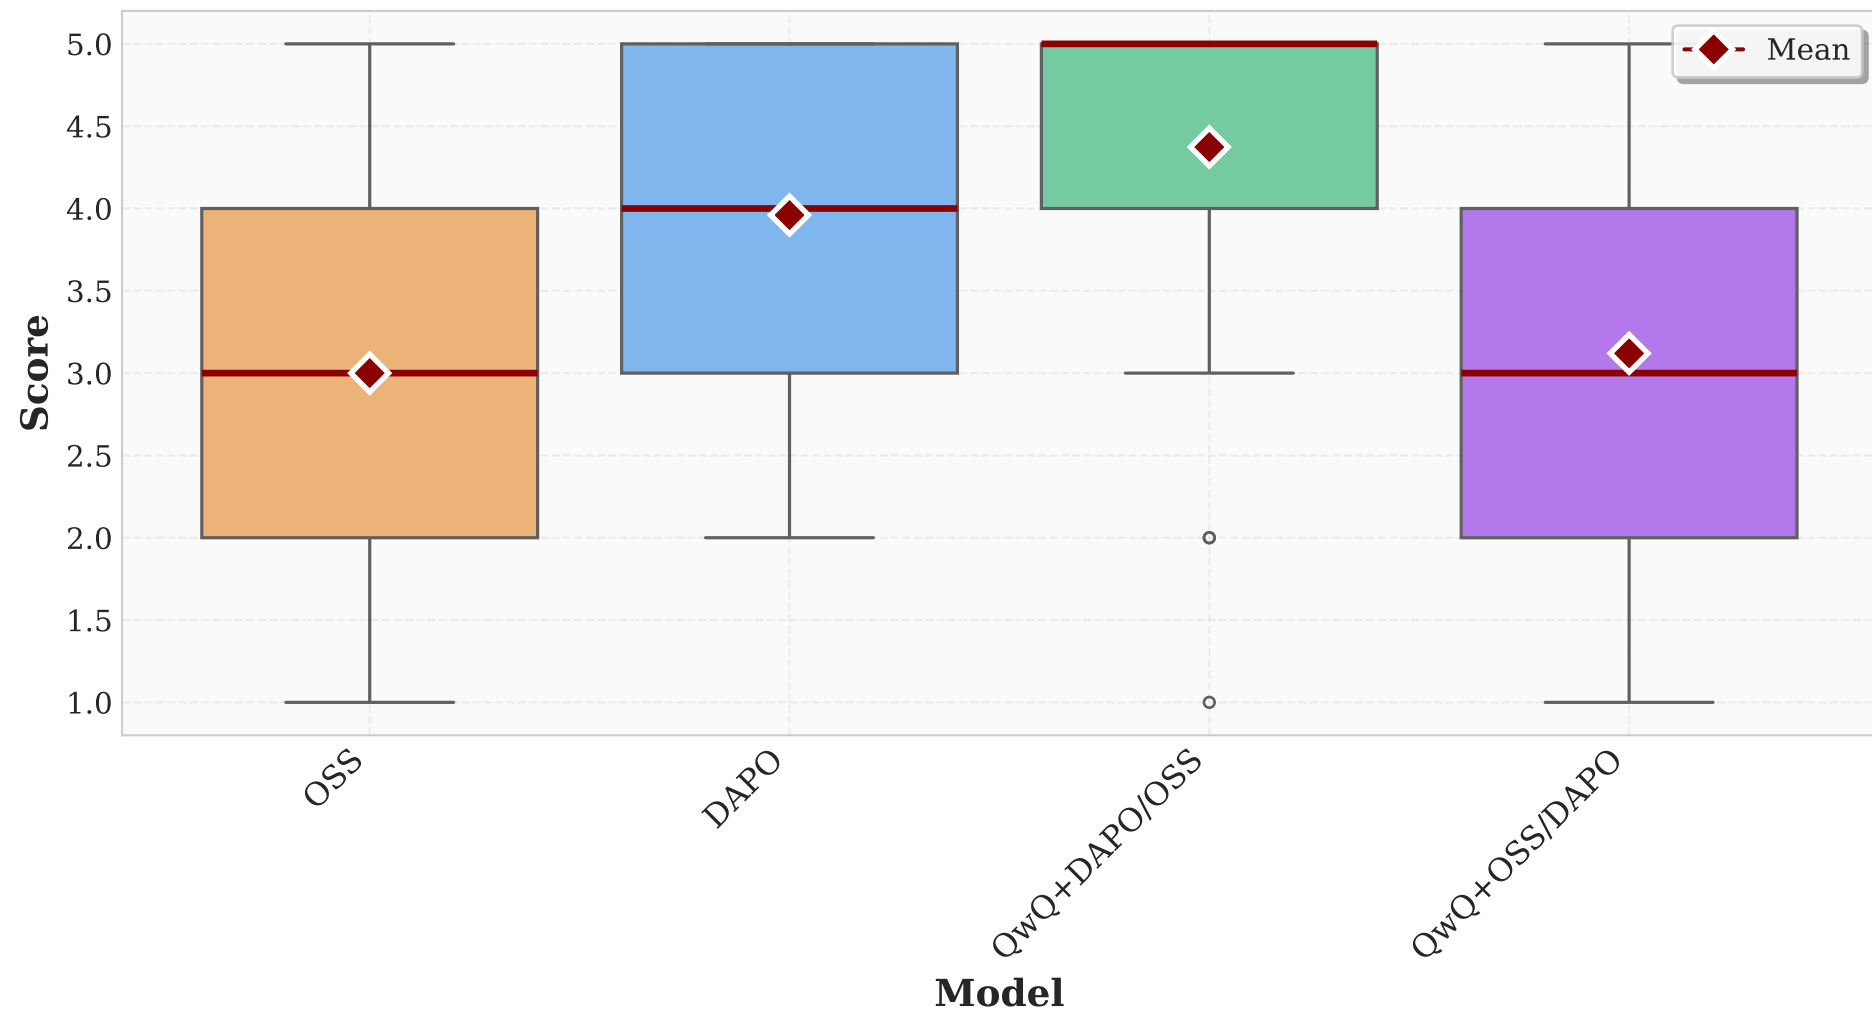

Supplement: supplementary_material [file boxplot_Ease_of_Following_all_rows-checkpoint.pdf › anon_code/evaluation/plots_user_study/.ipynb_checkpoints/boxplot_Ease_of_Following_all_rows-checkpoint.pdf]
