# Supplementary material
Source: ML conference proceedings conference paper supplement (https://openreview.net/forum?id=N6ZYsmzMDQ)

Comprehensive Model Evaluation Dashboard

Performance Metrics

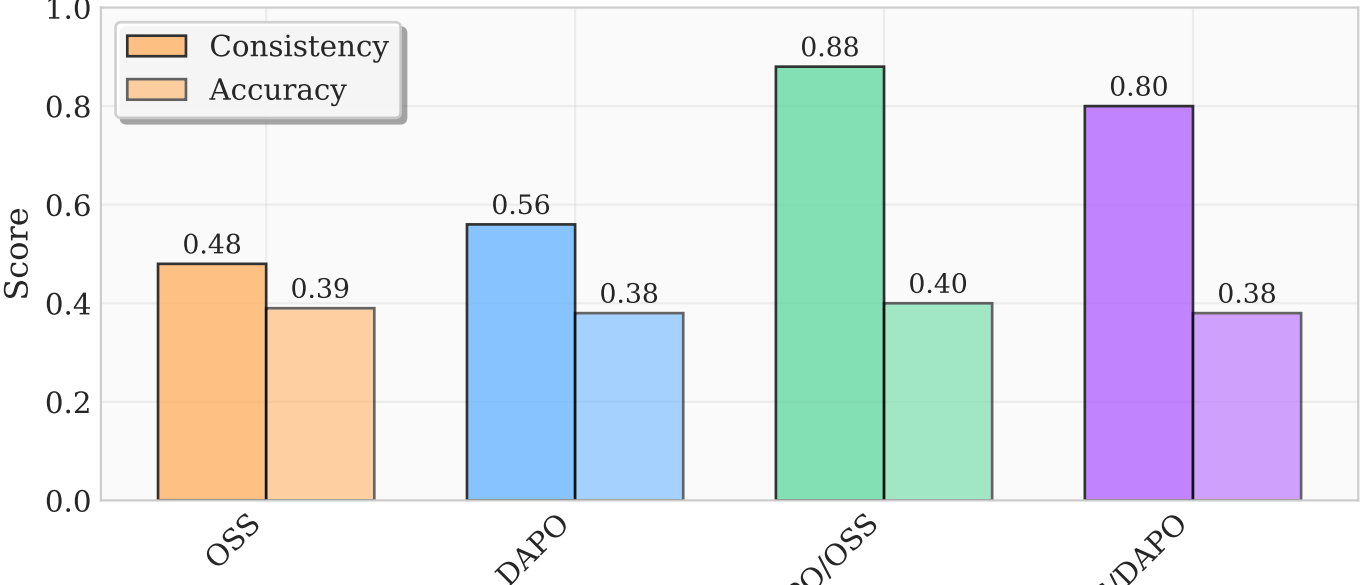

Consistency vs Accuracy

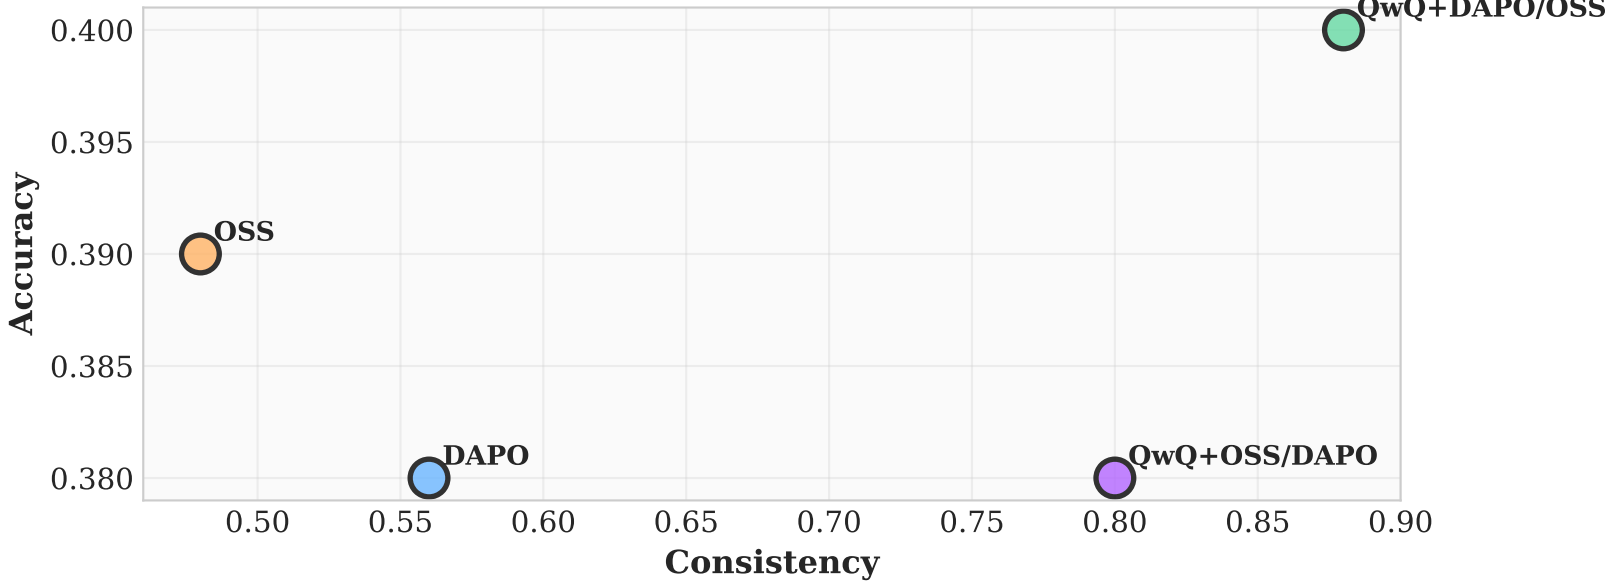

Clarity of Steps

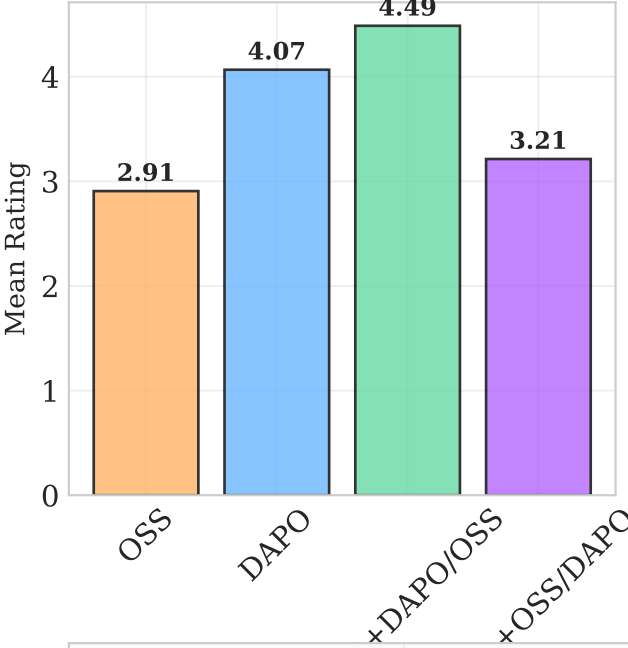

Ease of following

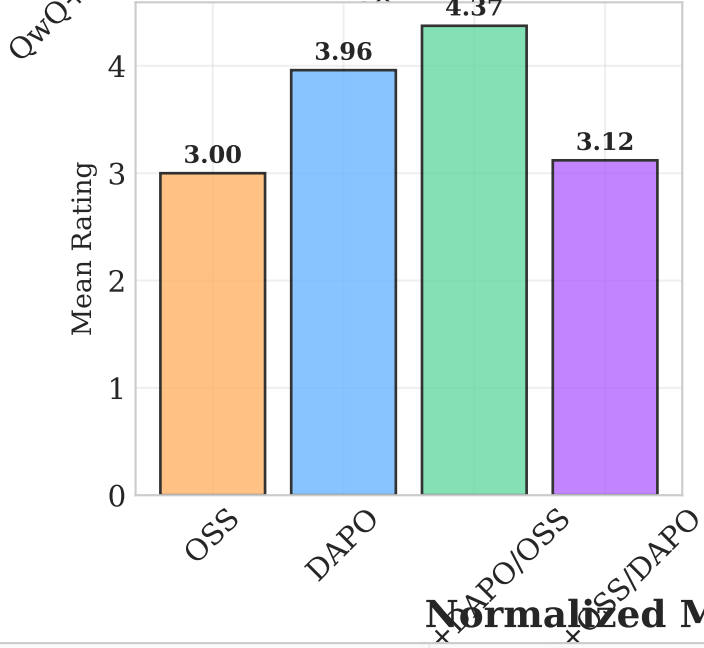

Confidence

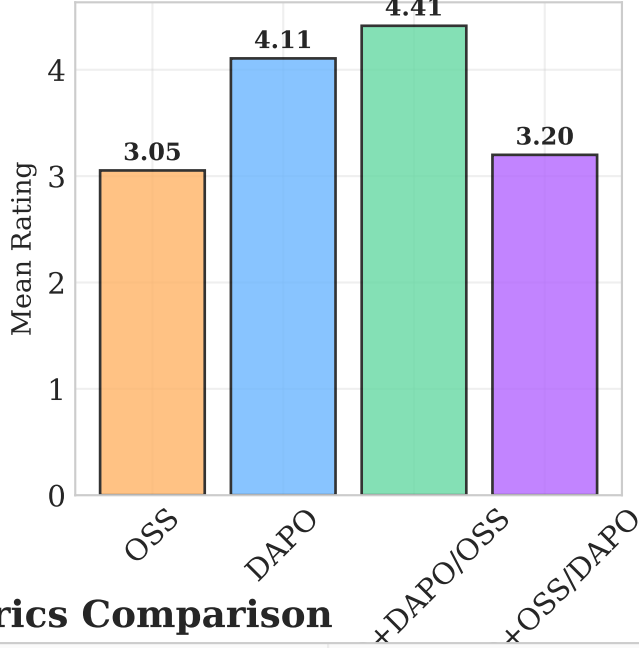

Best Overall

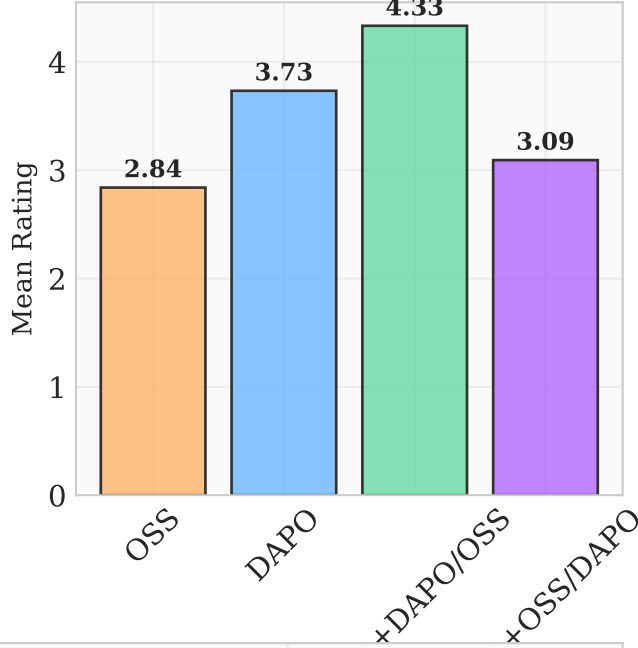

Normalized Metrics Comparison

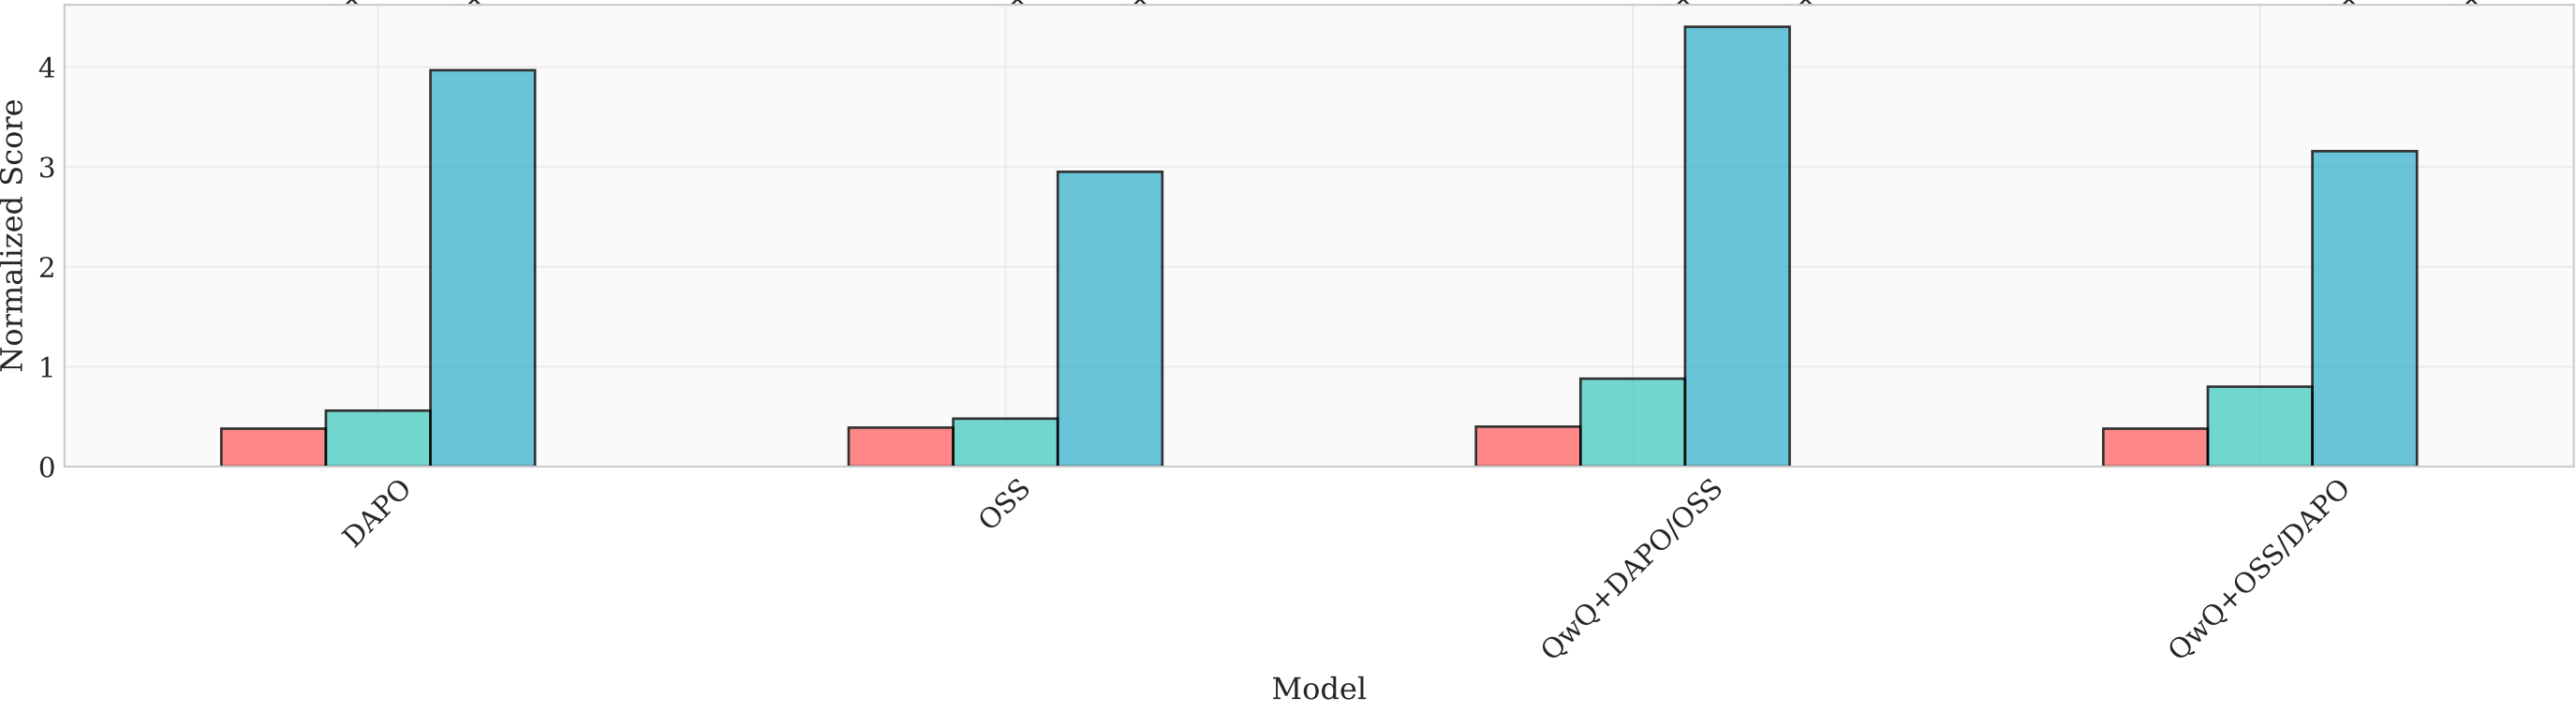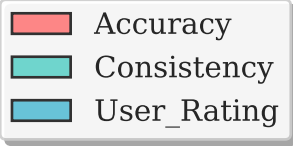

Supplement: supplementary_material [file comprehensive_dashboard_all_rows.pdf › anon_code/evaluation/plots_enhanced_user_study/comprehensive_dashboard_all_rows.pdf]
