# Supplementary material
Source: ML conference proceedings conference paper supplement (https://openreview.net/forum?id=N6ZYsmzMDQ)

**Model-to-Model Consistency Matrix**

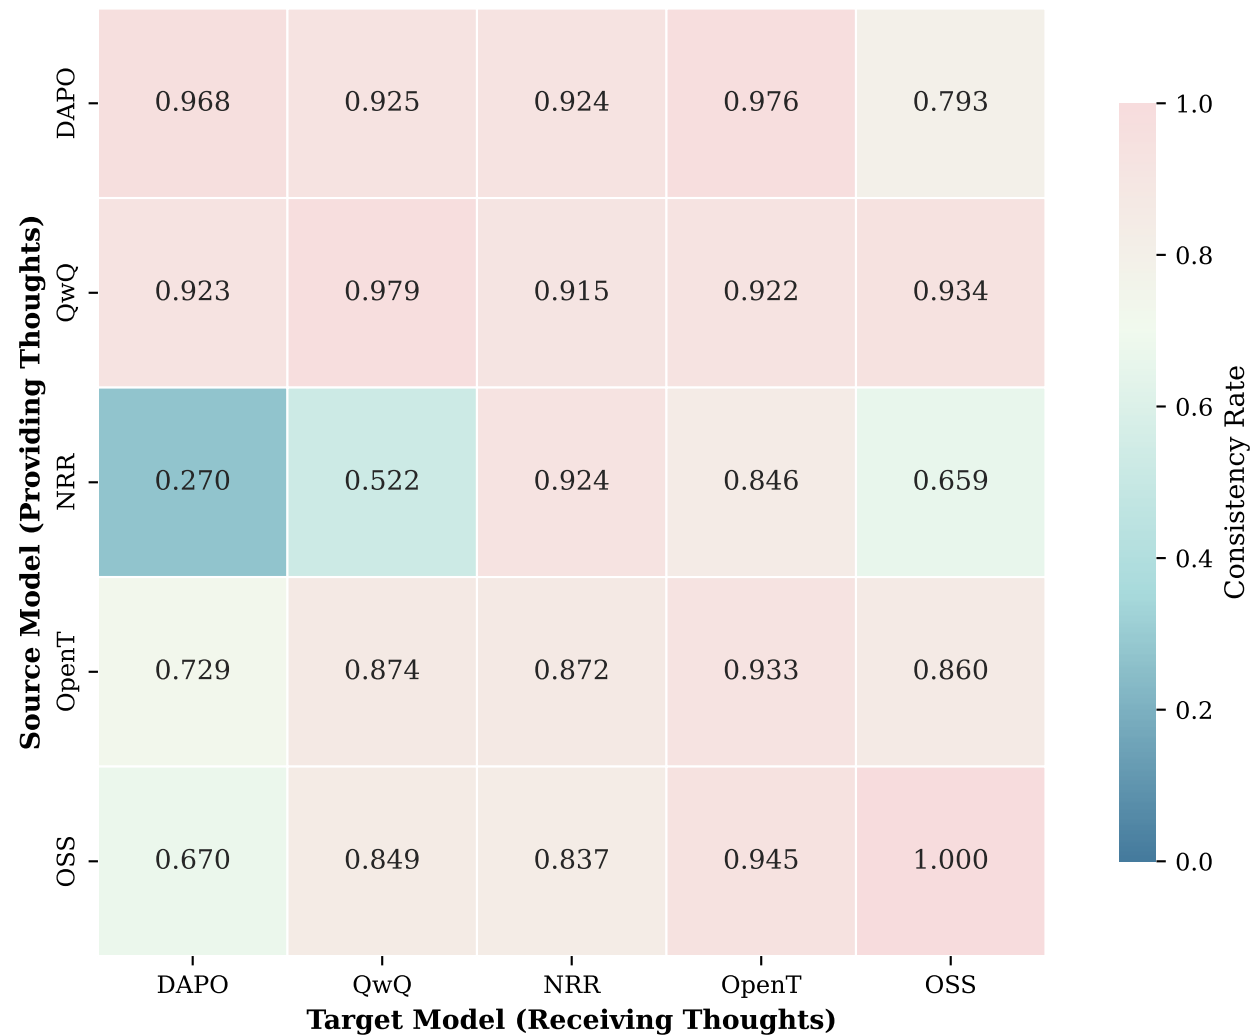

Supplement: supplementary_material [file consistency_heatmap-checkpoint.pdf › anon_code/evaluation/notebooks/.ipynb_checkpoints/consistency_heatmap-checkpoint.pdf]
