# Supplementary material
Source: ML conference proceedings conference paper supplement (https://openreview.net/forum?id=N6ZYsmzMDQ)

# Correlation Analysis: Performance Metrics vs User Preferences

## Consistency vs User Preference

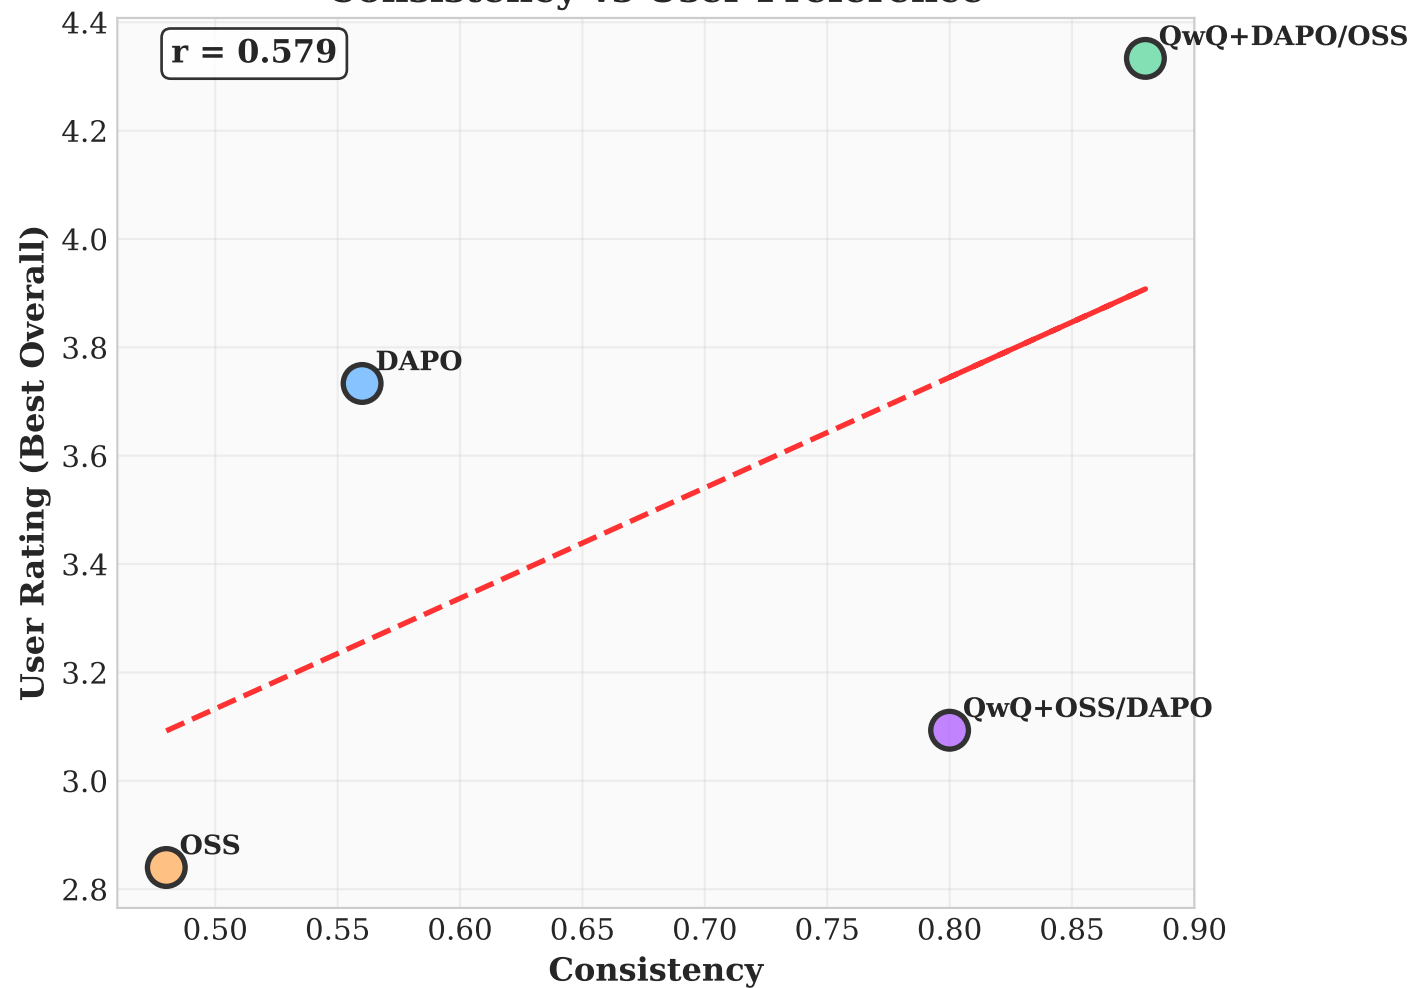

## Accuracy vs User Preference

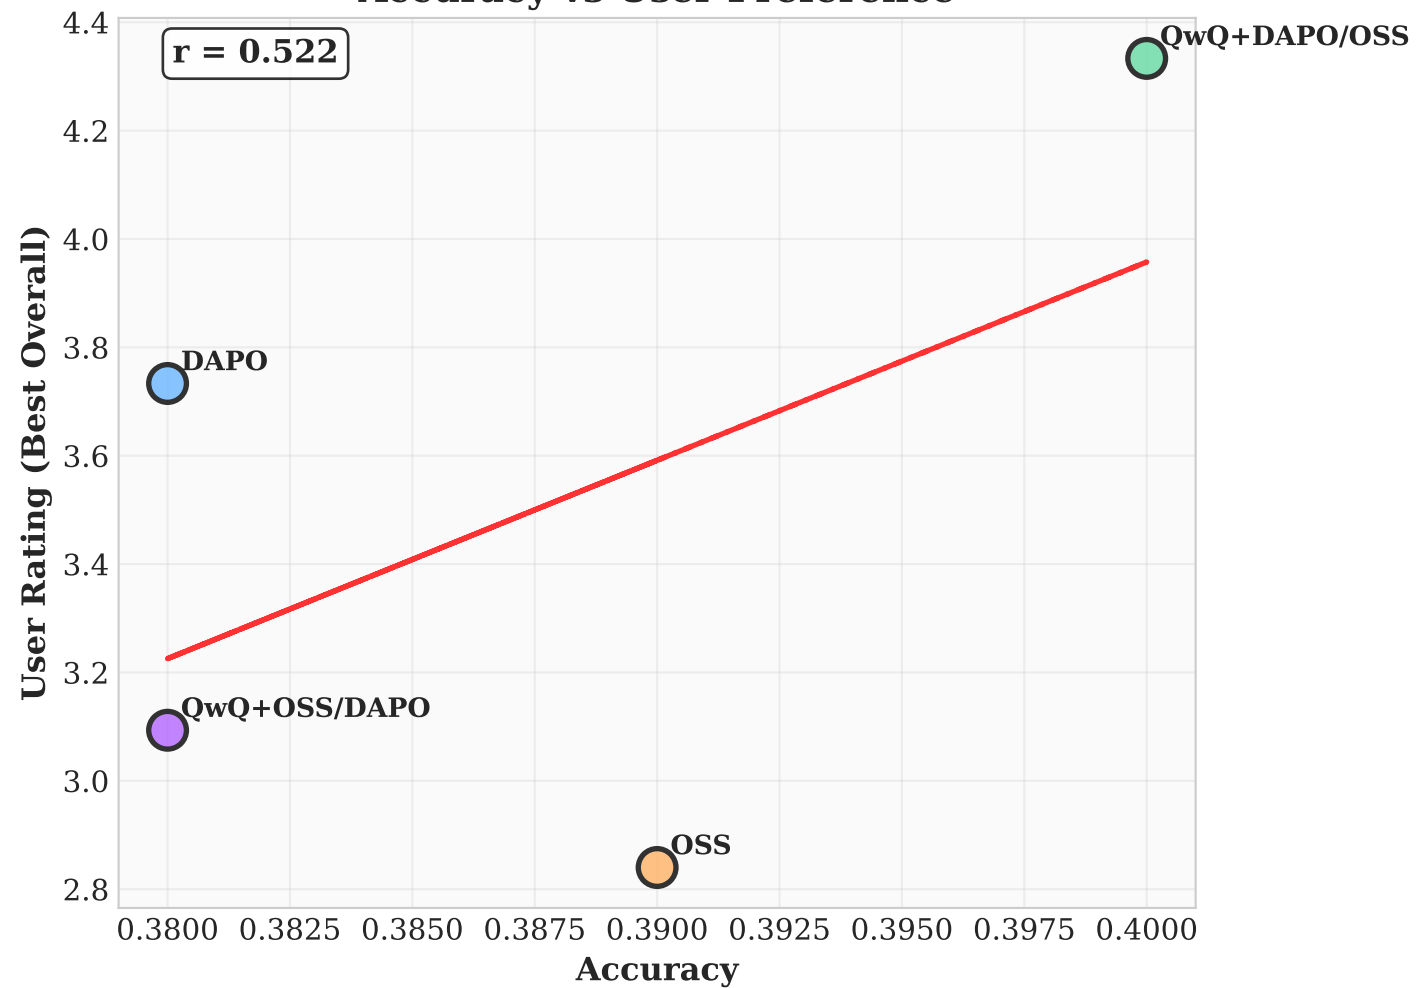

Supplement: supplementary_material [file correlation_analysis_all_rows.pdf › anon_code/evaluation/plots_enhanced_user_study/correlation_analysis_all_rows.pdf]
