# Supplementary material
Source: ML conference proceedings conference paper supplement (https://openreview.net/forum?id=N6ZYsmzMDQ)

**Model-to-Model Consistency Matrix**

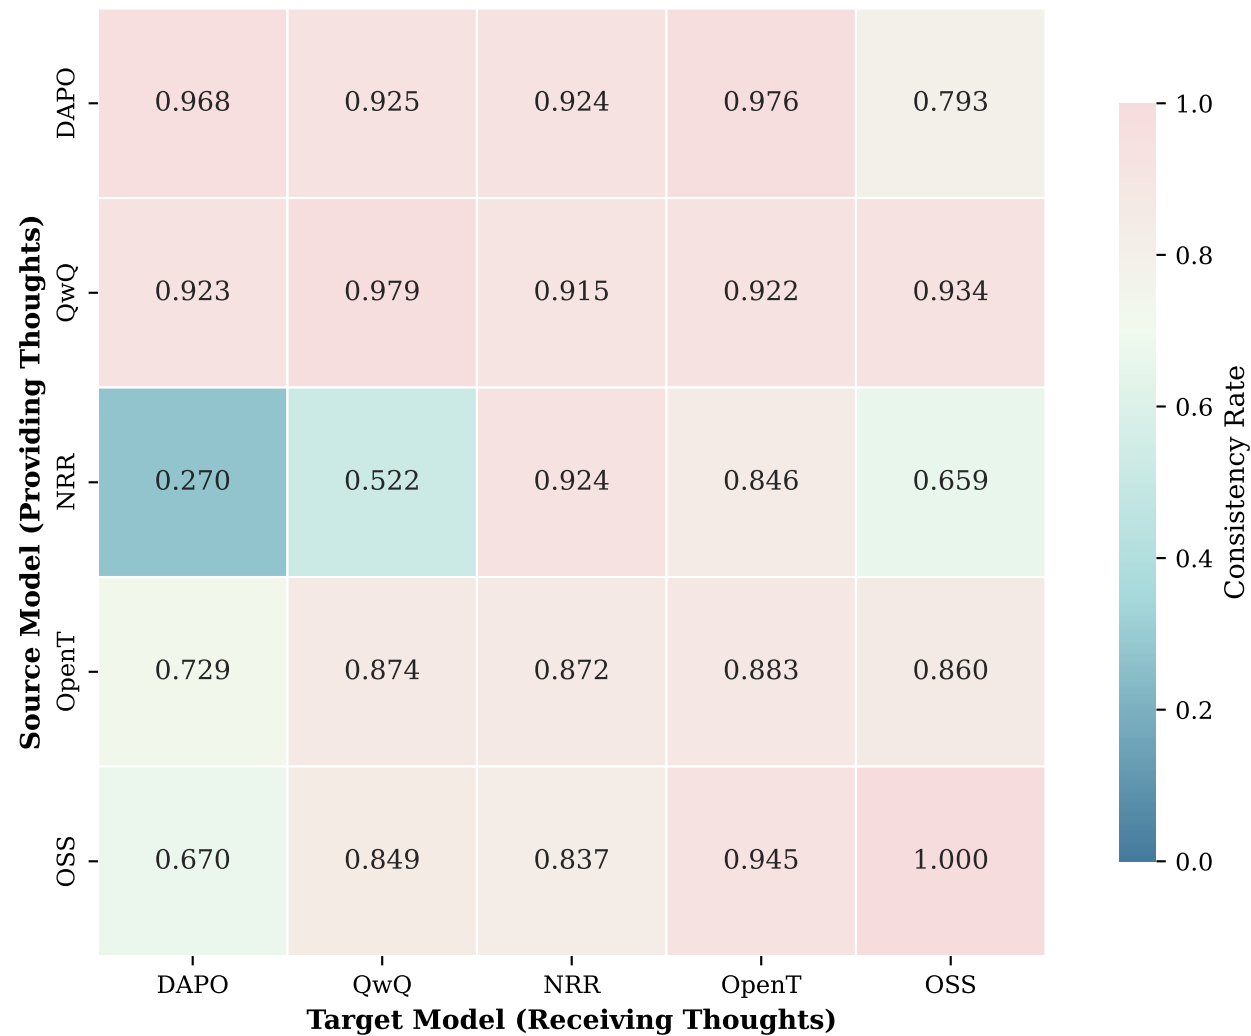

**Average Consistency by Model and Role**

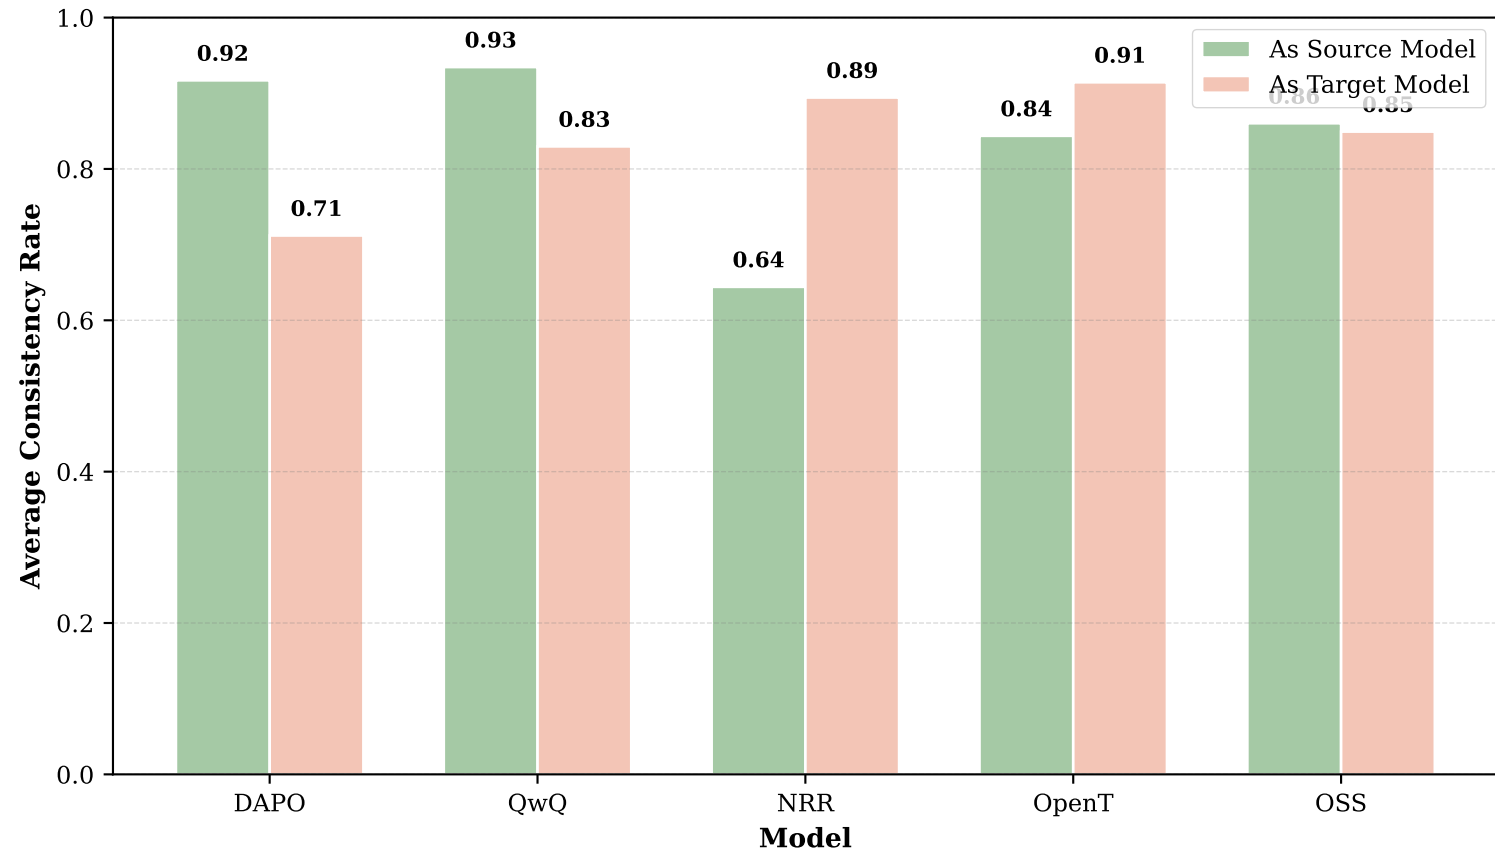

**Pairwise Target Model Consistency by Source**

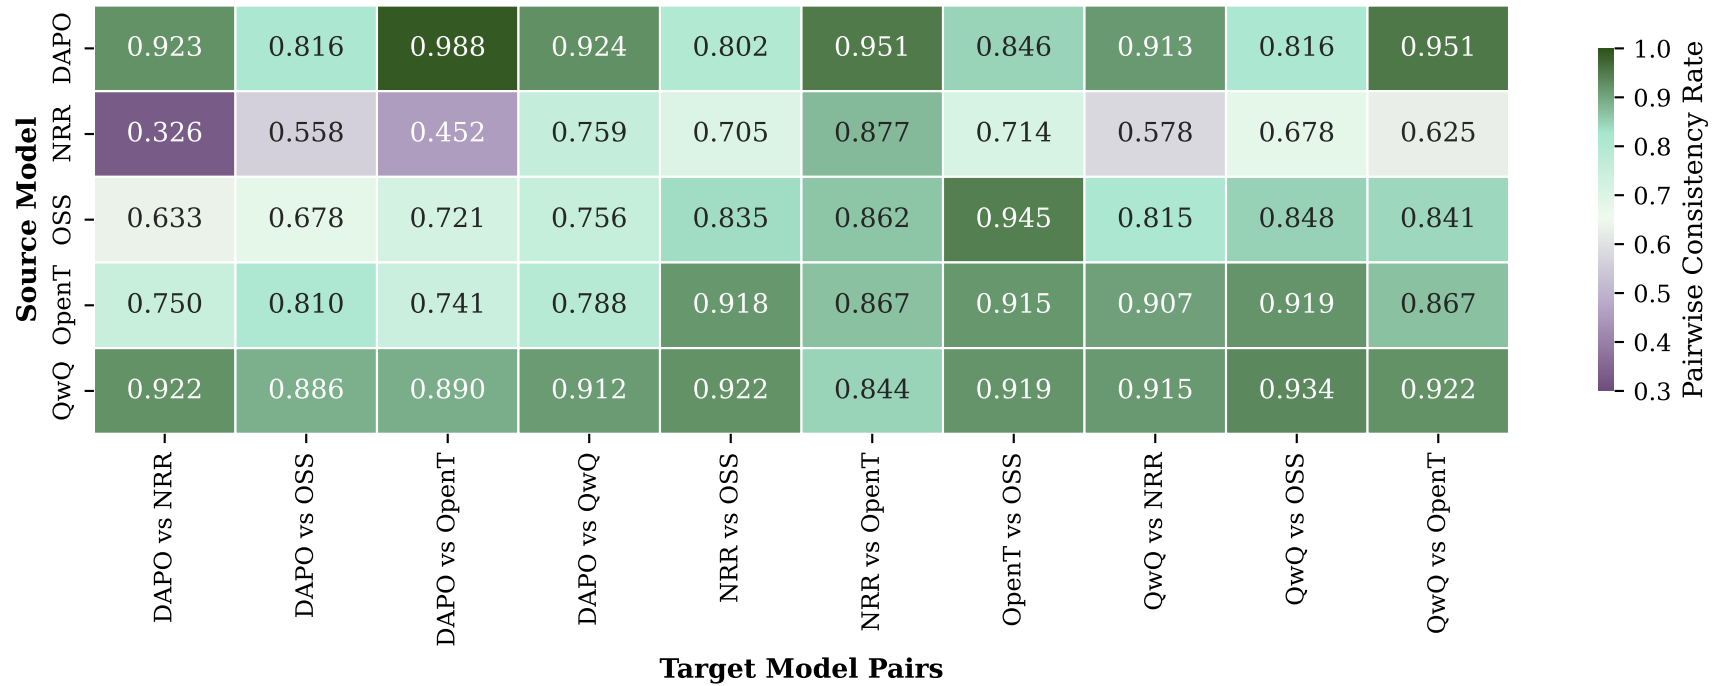

**Average Pairwise Consistency Between Target Models**

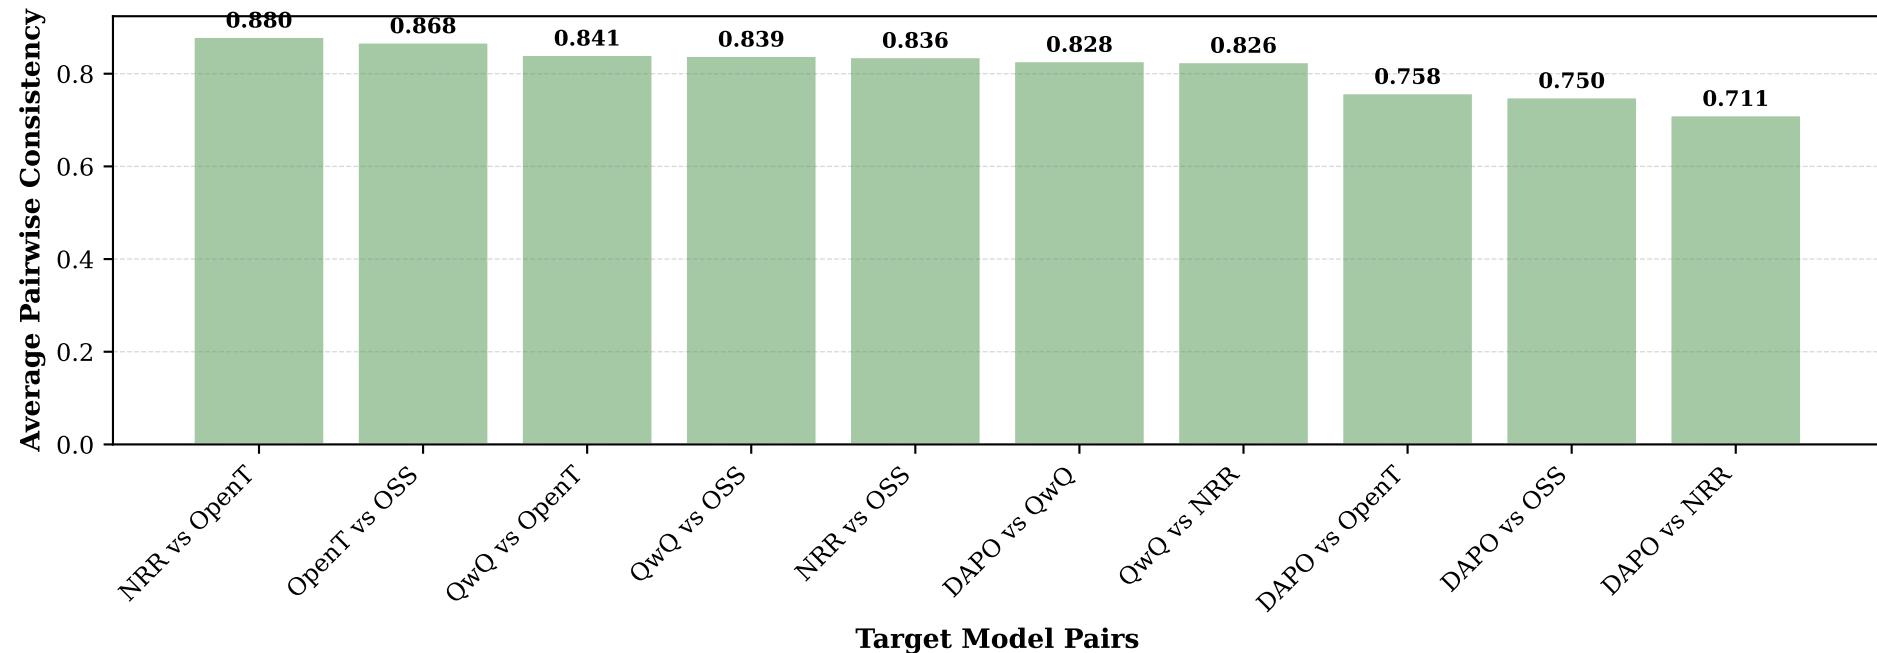

Supplement: supplementary_material [file model_consistency_analysis-checkpoint.pdf › anon_code/evaluation/notebooks/.ipynb_checkpoints/model_consistency_analysis-checkpoint.pdf]
