# Supplementary material
Source: ML conference proceedings conference paper supplement (https://openreview.net/forum?id=N6ZYsmzMDQ)

**QwQ + OpenT / GPT**

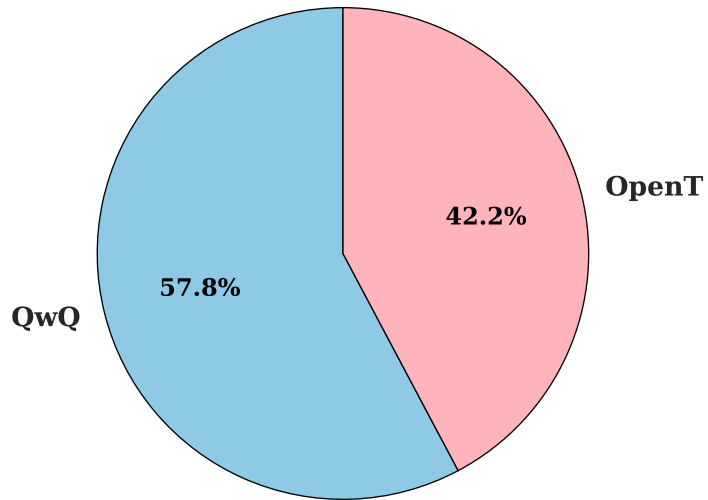

**QwQ + GPT / DAPO**

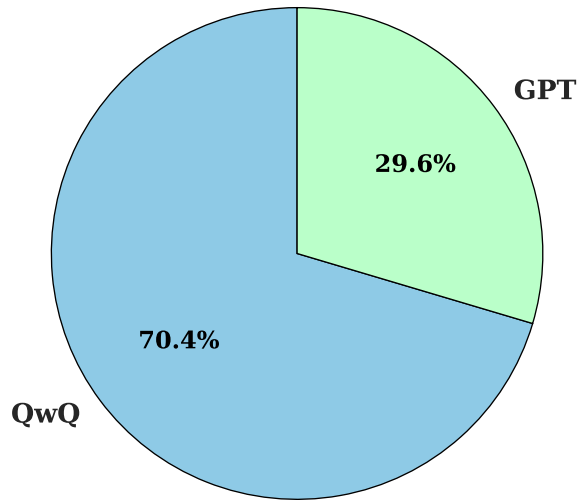

**QwQ + DAPO / GPT**

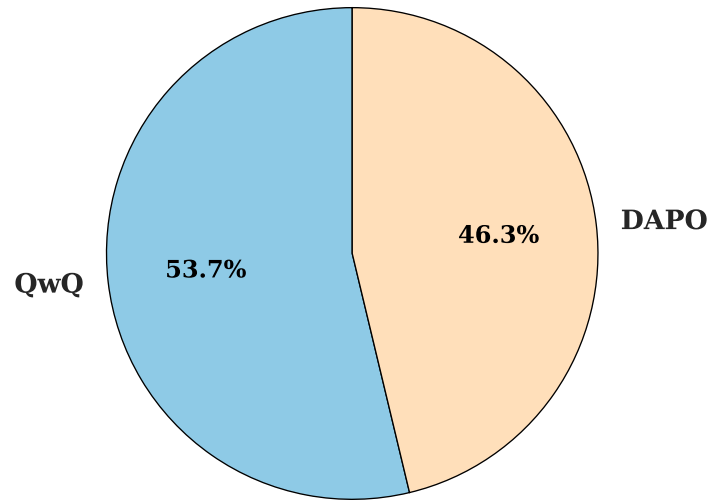

Supplement: supplementary_material [file model_distribution_analysis-checkpoint.pdf › anon_code/evaluation/notebooks/.ipynb_checkpoints/model_distribution_analysis-checkpoint.pdf]
