# Supplementary material
Source: ML conference proceedings conference paper supplement (https://openreview.net/forum?id=N6ZYsmzMDQ)

# Model Involvement in CoT Creation vs. Consistency

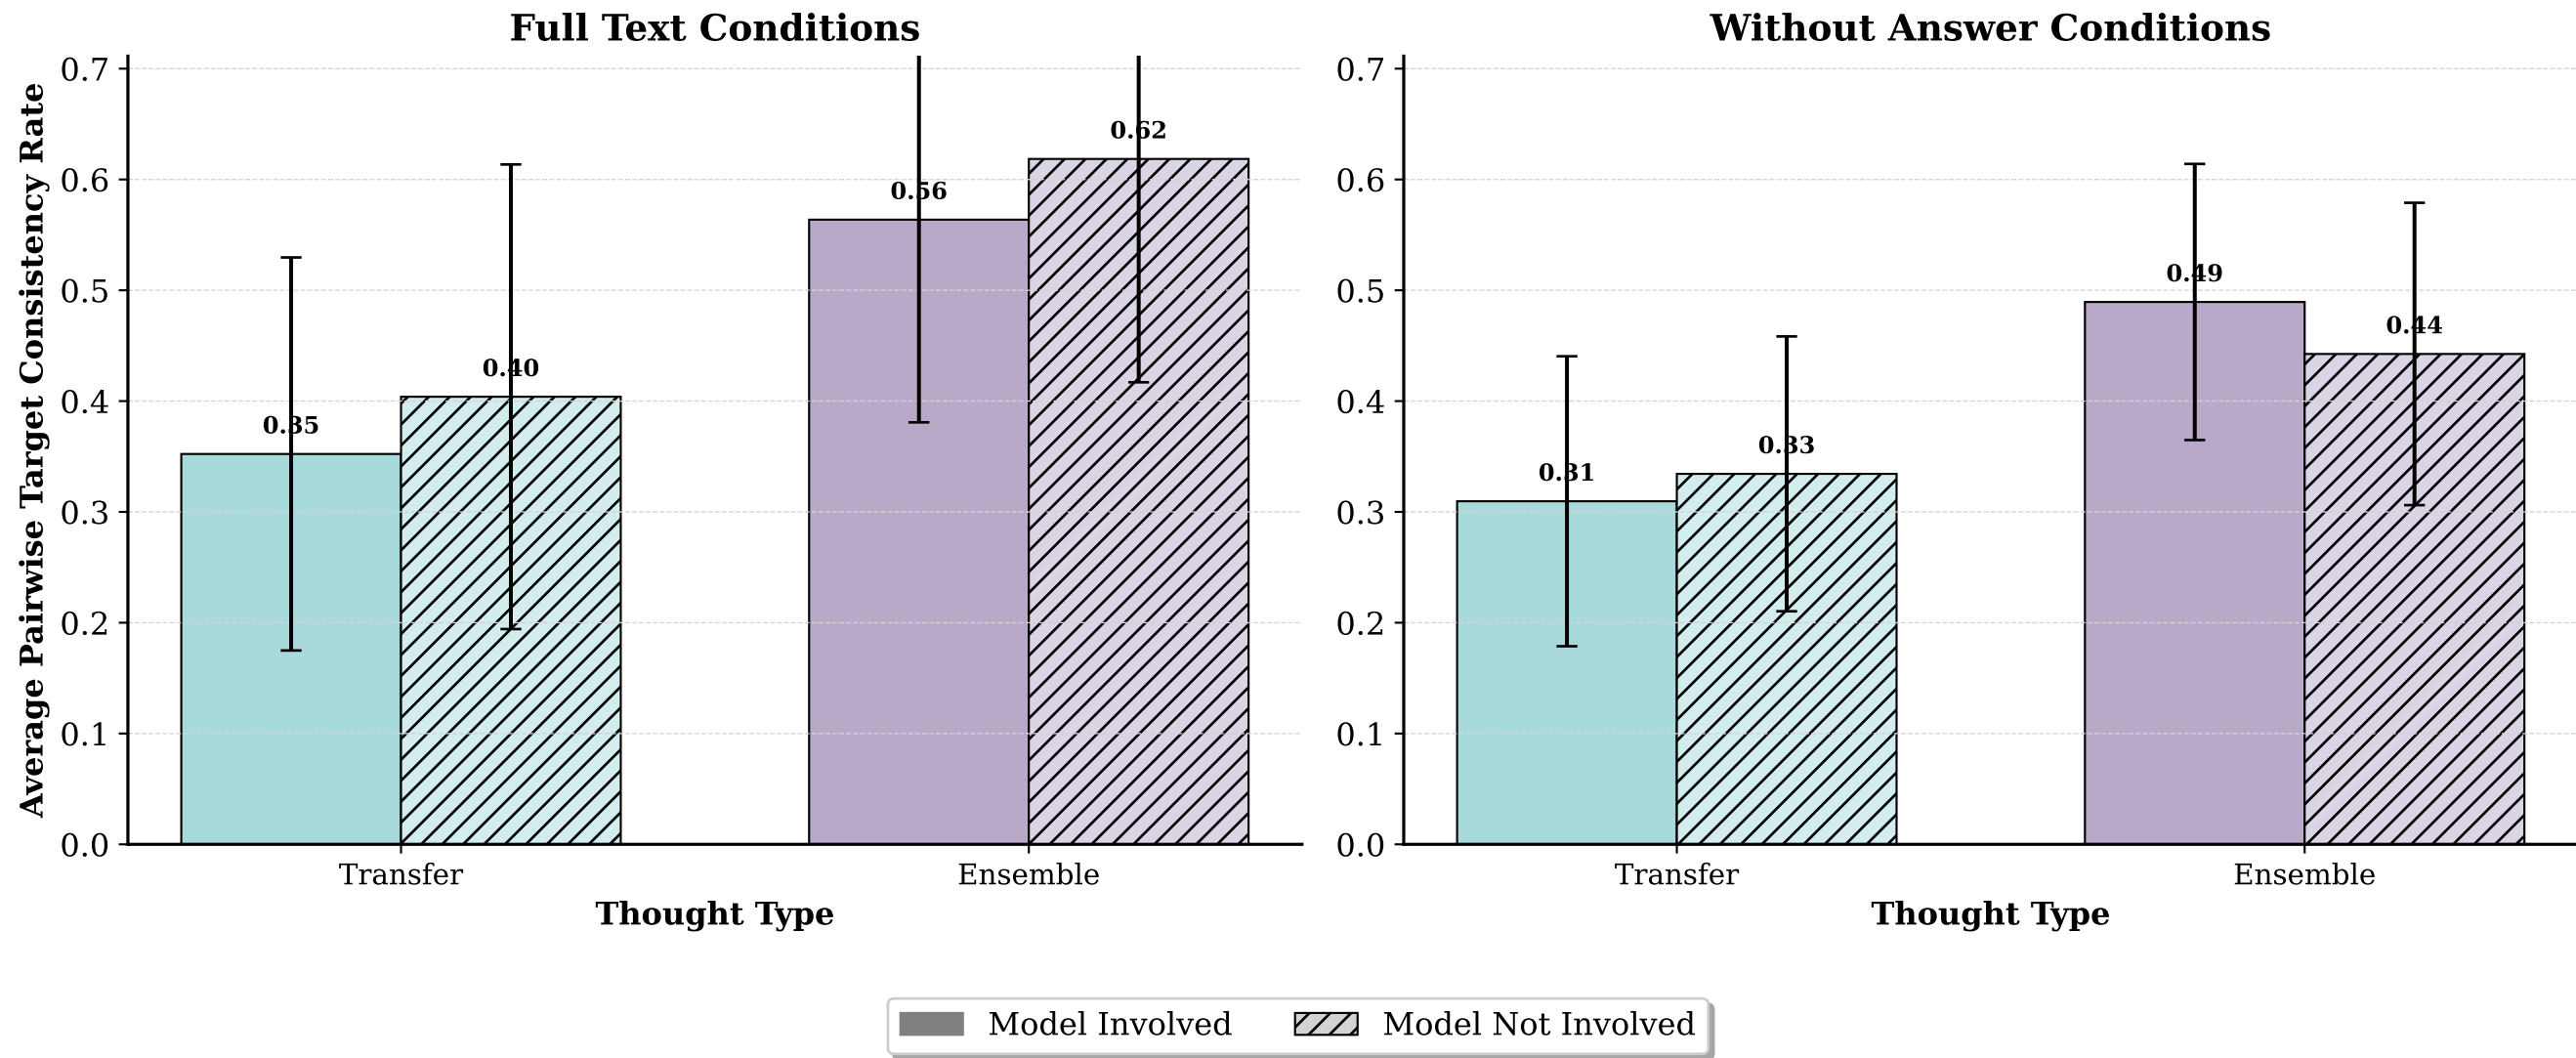

Supplement: supplementary_material [file model_involvement_consistency_clean-checkpoint.pdf › anon_code/evaluation/notebooks/.ipynb_checkpoints/model_involvement_consistency_clean-checkpoint.pdf]
