# Supplementary material
Source: ML conference proceedings conference paper supplement (https://openreview.net/forum?id=N6ZYsmzMDQ)
Supplement: supplementary_material [file model_involvement_consistency_grayscale-checkpoint.pdf › anon_code/evaluation/notebooks/.ipynb_checkpoints/model_involvement_consistency_grayscale-checkpoint.pdf]

# Model Involvement in CoT Creation vs. Consistency

## Full Text Conditions

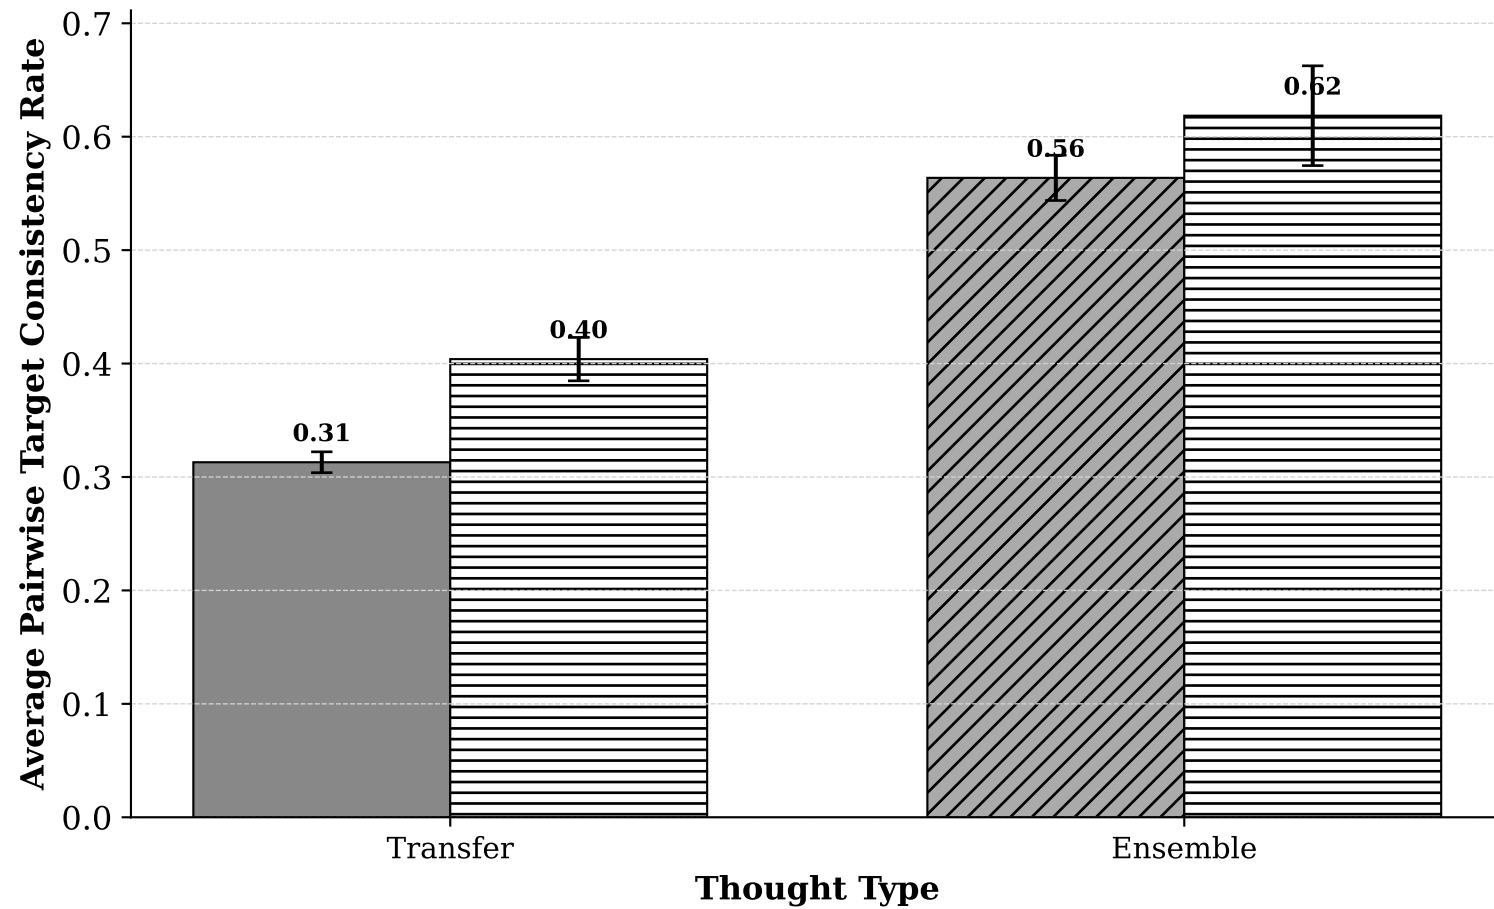

## Without Answer Conditions

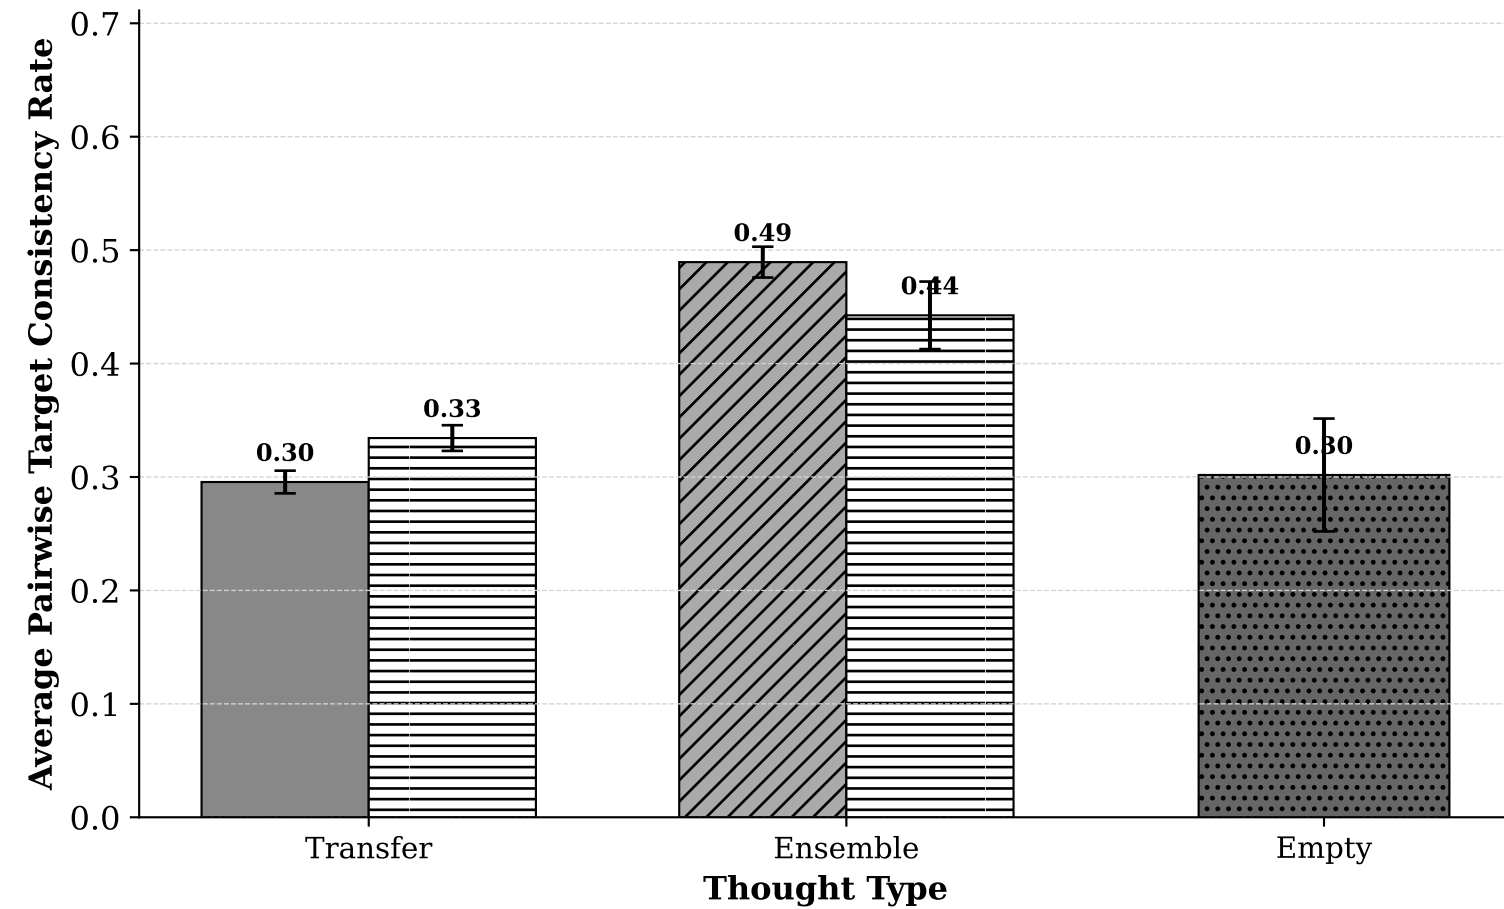

Model Involved    Model Not Involved    Empty Pairwise
