# Supplementary material
Source: ML conference proceedings conference paper supplement (https://openreview.net/forum?id=N6ZYsmzMDQ)
Supplement: supplementary_material [file model_performance_comparison-checkpoint.pdf › anon_code/evaluation/notebooks/.ipynb_checkpoints/model_performance_comparison-checkpoint.pdf]

# Chain-of-Thought Reasoning Performance Comparison

## Sample Dataset

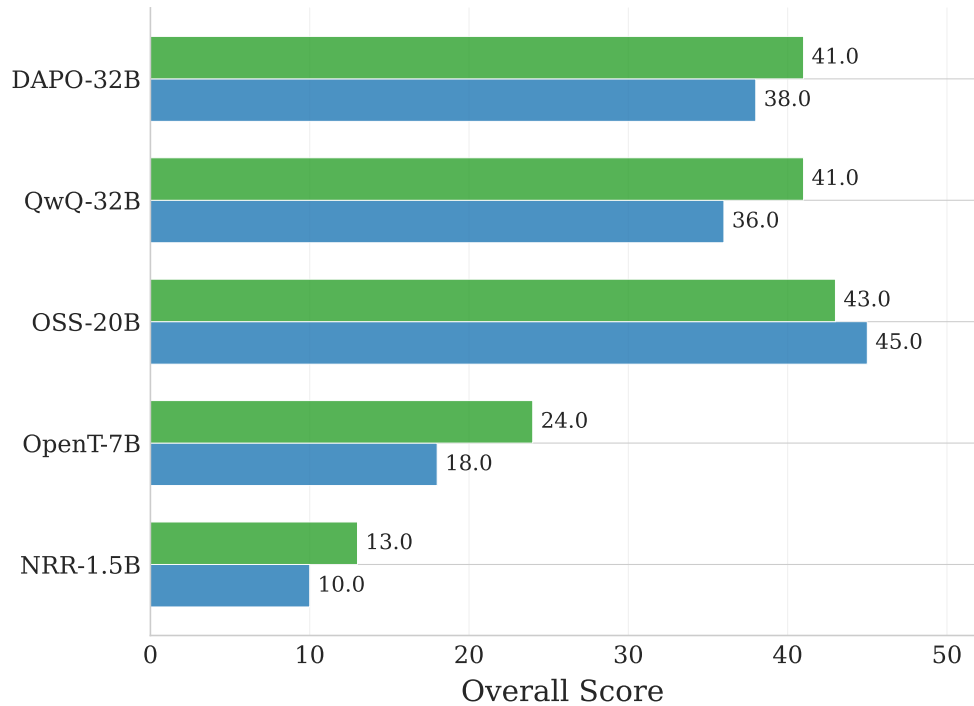

## Full Dataset

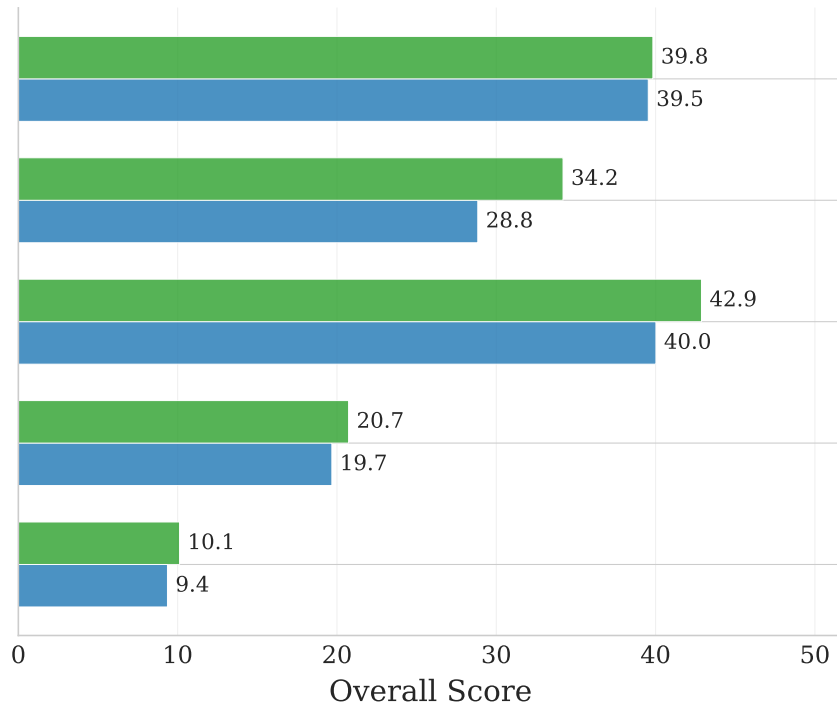

Empty CoT    Default CoT
