# Supplementary material
Source: ML conference proceedings conference paper supplement (https://openreview.net/forum?id=N6ZYsmzMDQ)

Pairwise Target Model Consistency by Source

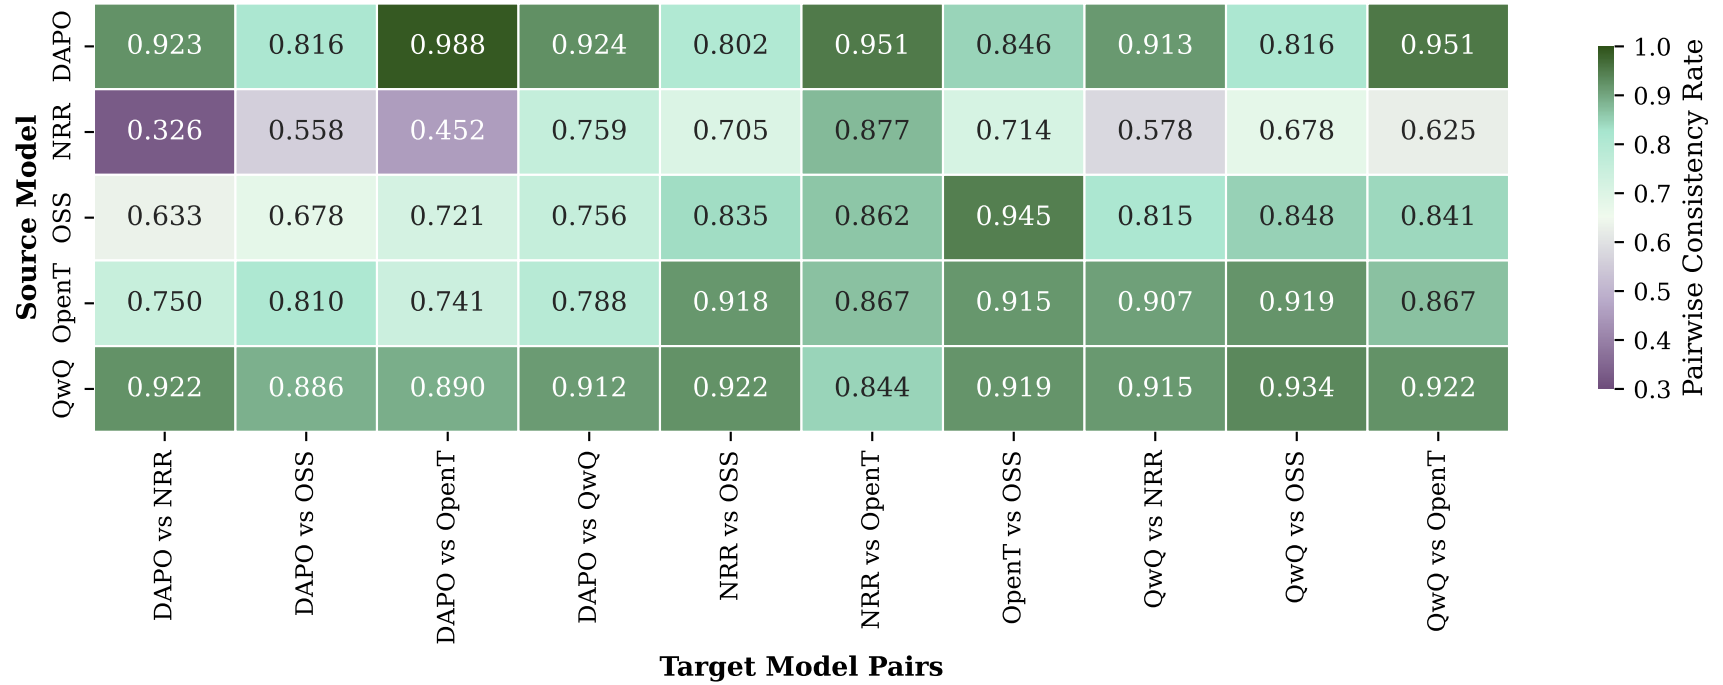

Average Pairwise Consistency Between Target Models

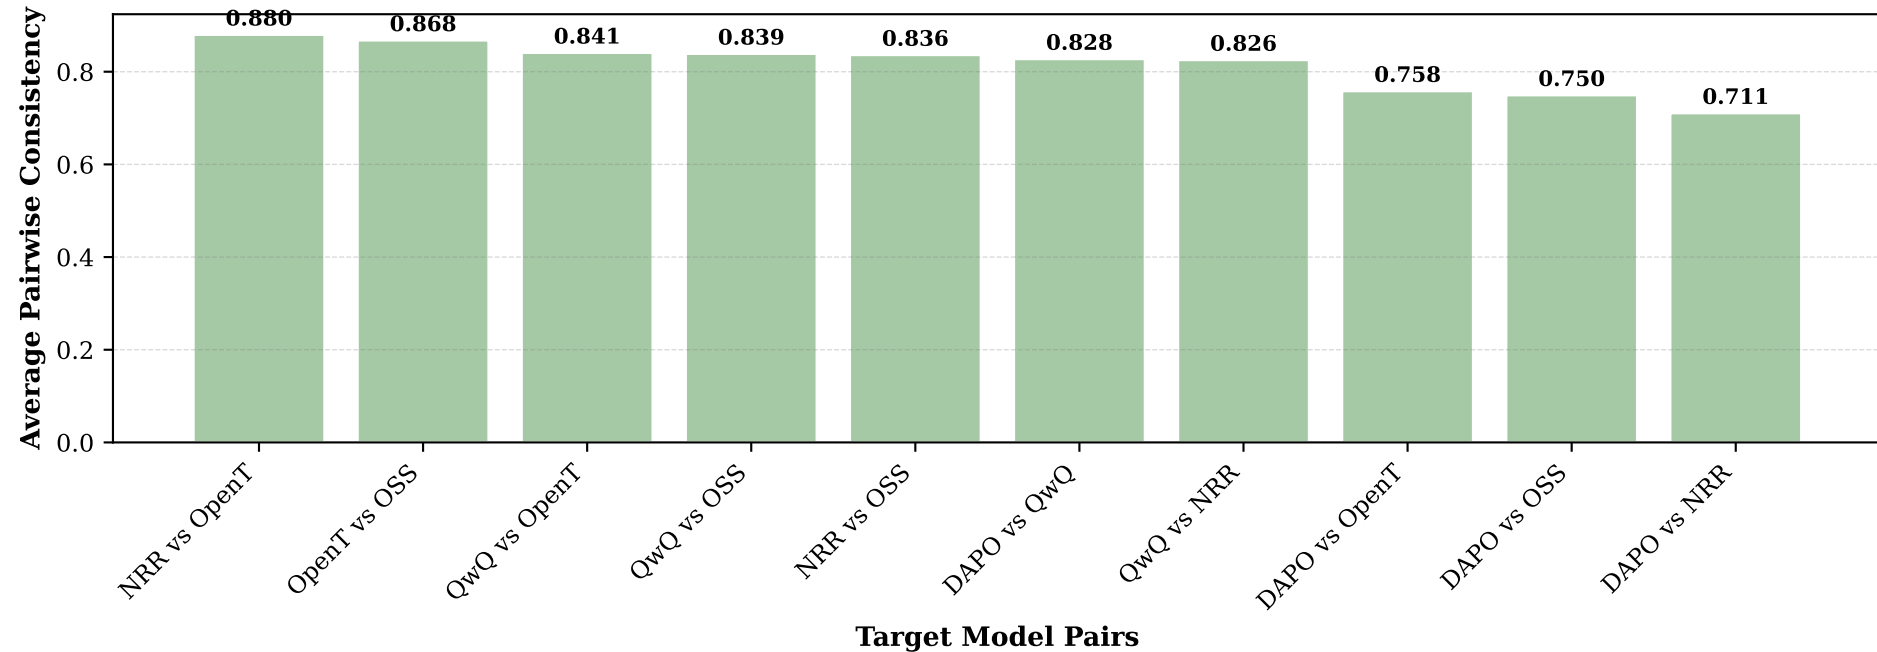

Supplement: supplementary_material [file pairwise_target_consistency-checkpoint.pdf › anon_code/evaluation/notebooks/.ipynb_checkpoints/pairwise_target_consistency-checkpoint.pdf]
