# Supplementary material
Source: ML conference proceedings conference paper supplement (https://openreview.net/forum?id=N6ZYsmzMDQ)

# Model Performance Overview

## Model Consistency

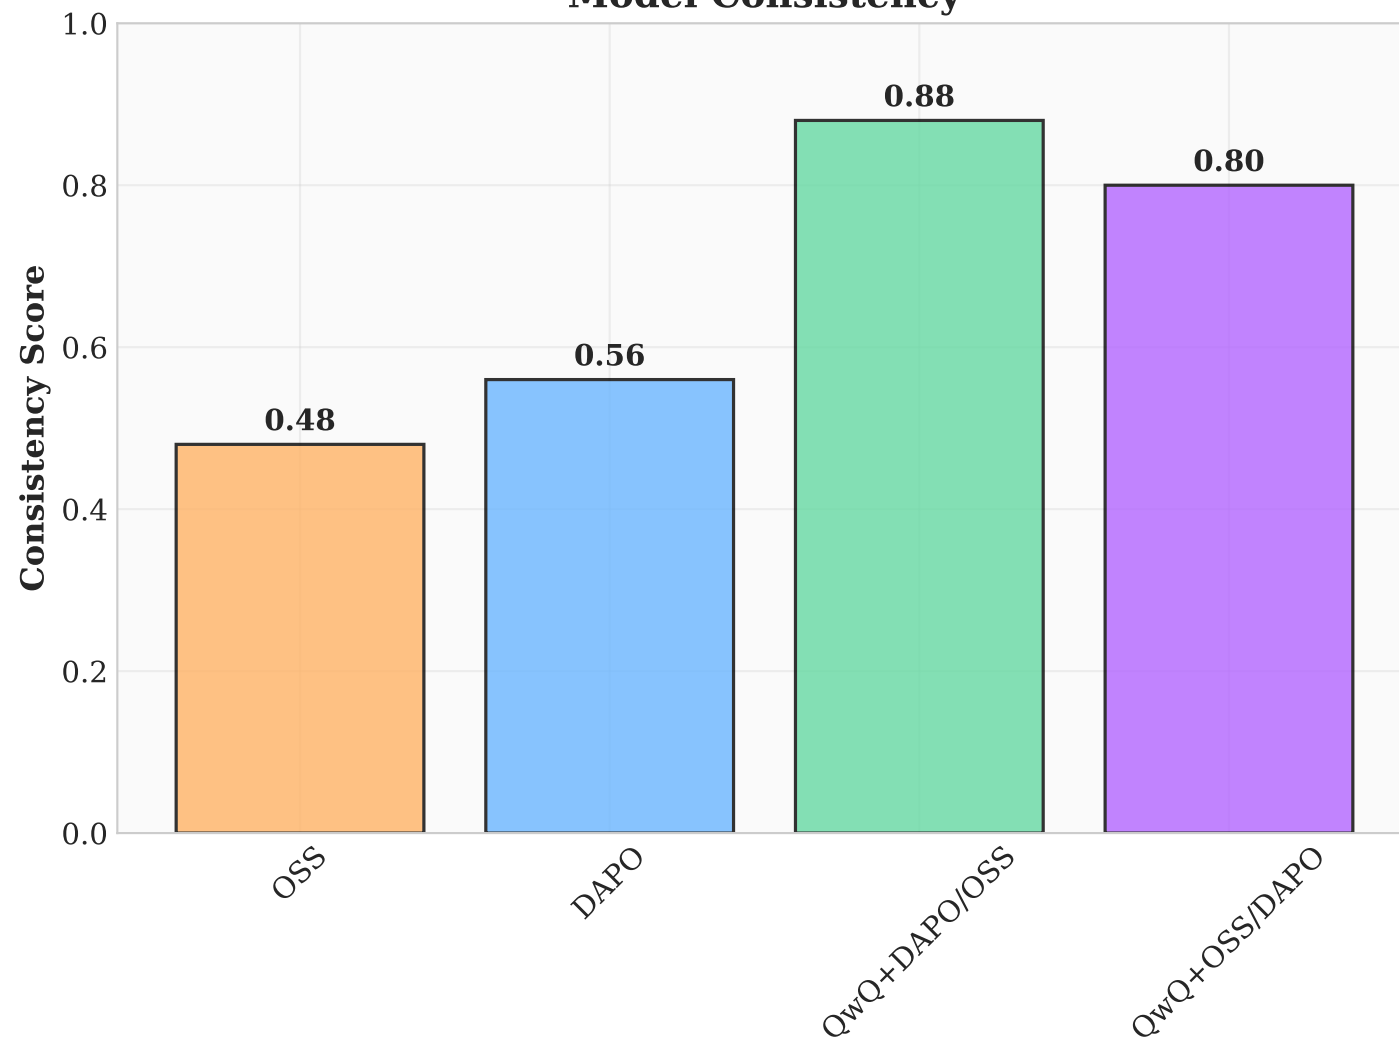

## Model Accuracy

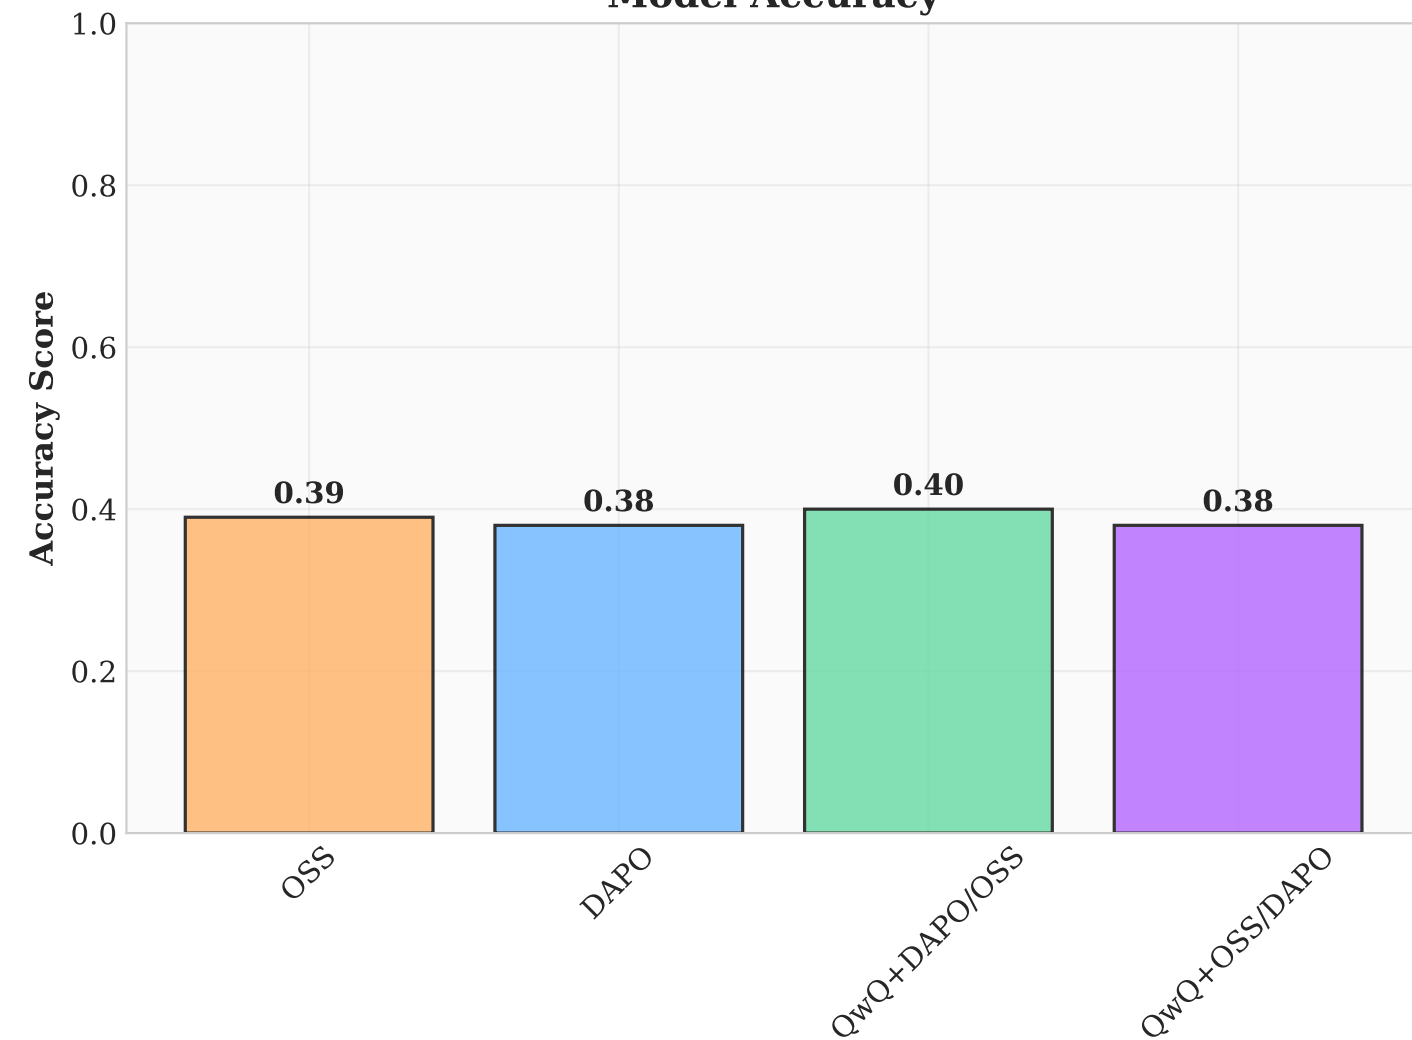

## User Study: Clarity of Steps

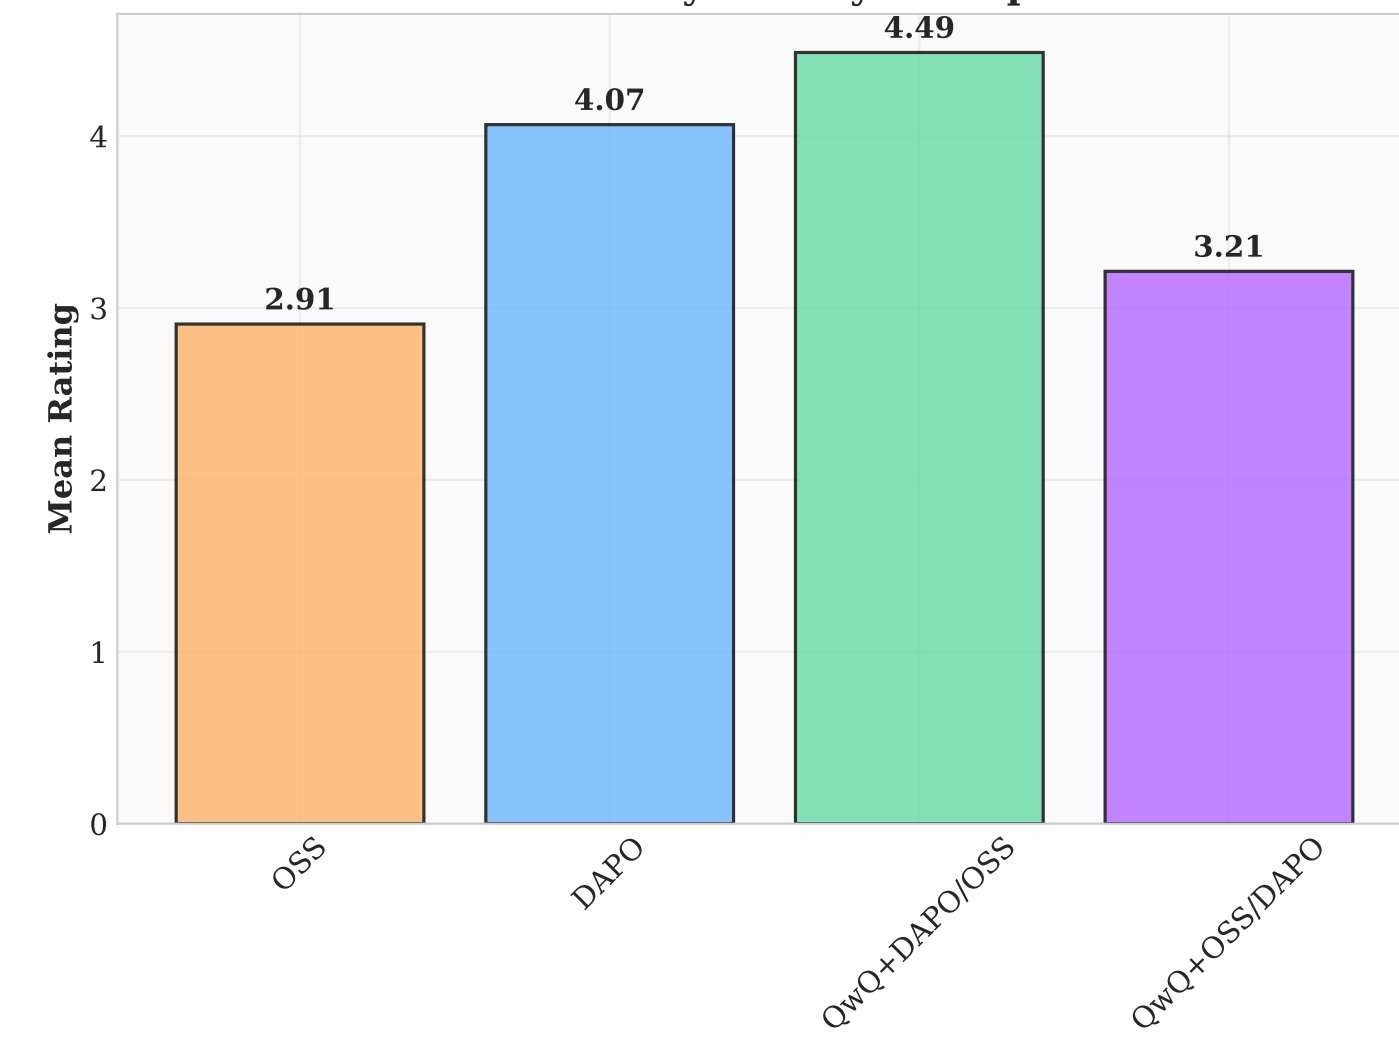

## User Study: Best Overall

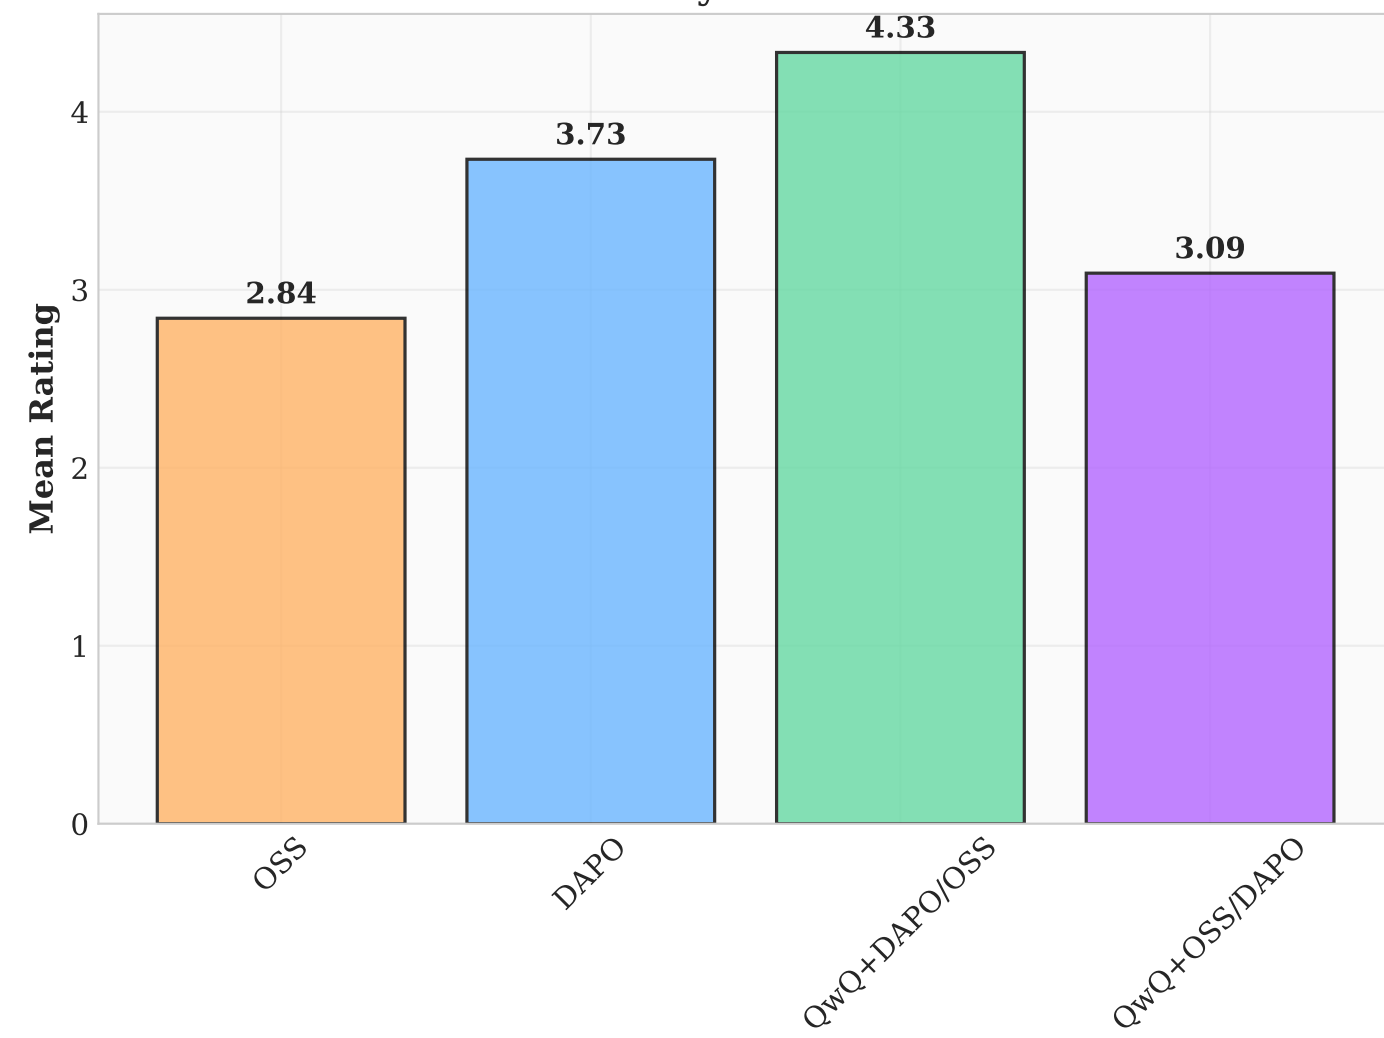

Supplement: supplementary_material [file performance_overview_all_rows.pdf › anon_code/evaluation/plots_enhanced_user_study/performance_overview_all_rows.pdf]
