# Supplementary material
Source: ML conference proceedings conference paper supplement (https://openreview.net/forum?id=N6ZYsmzMDQ)
Supplement: supplementary_material [file source_model_involvement_consistency-checkpoint.pdf › anon_code/evaluation/notebooks/.ipynb_checkpoints/source_model_involvement_consistency-checkpoint.pdf]

# Source Model Involvement in Pairwise Target Consistency

## Full Text Conditions

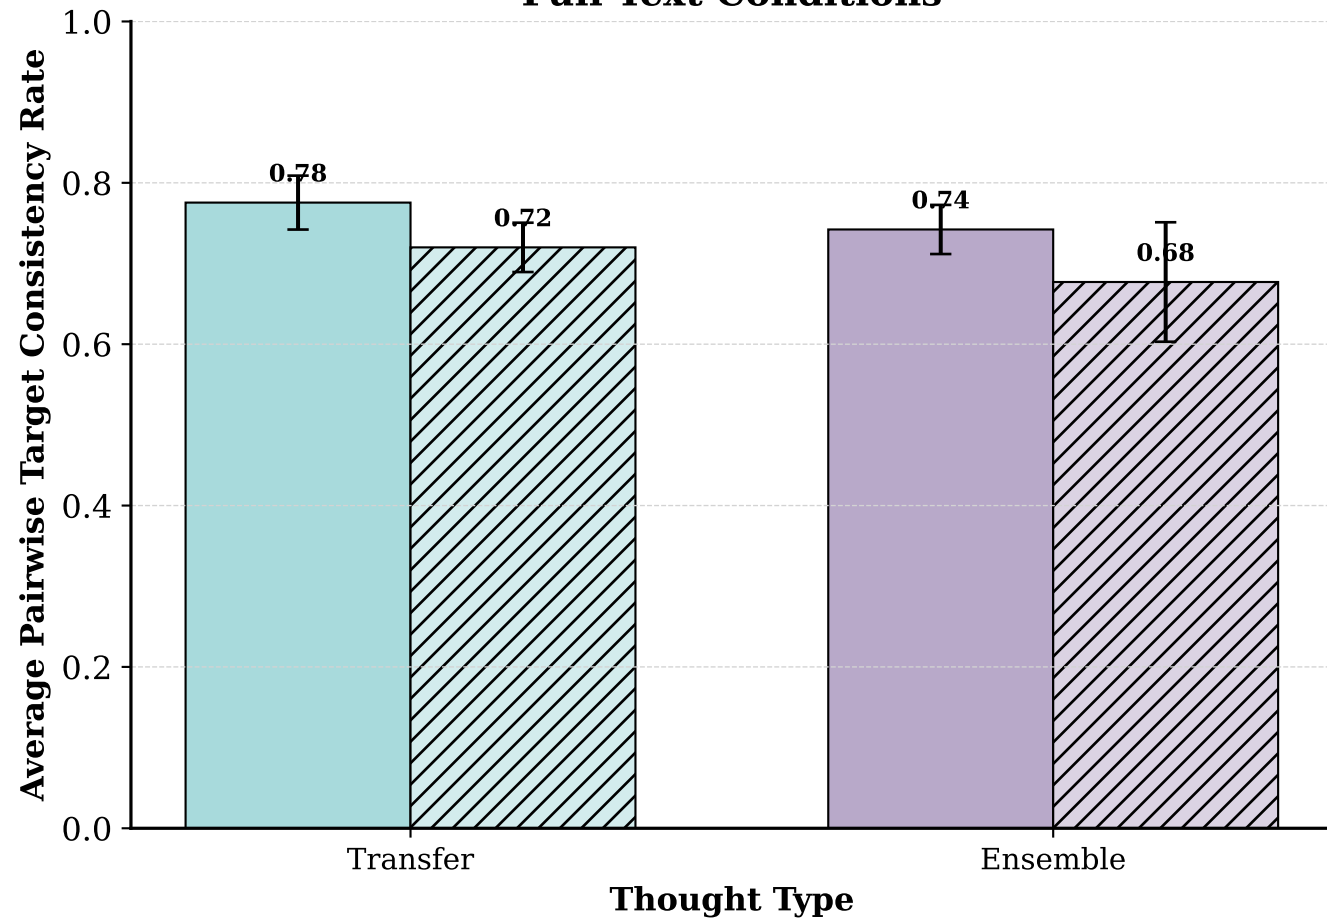

## Without Answer Conditions

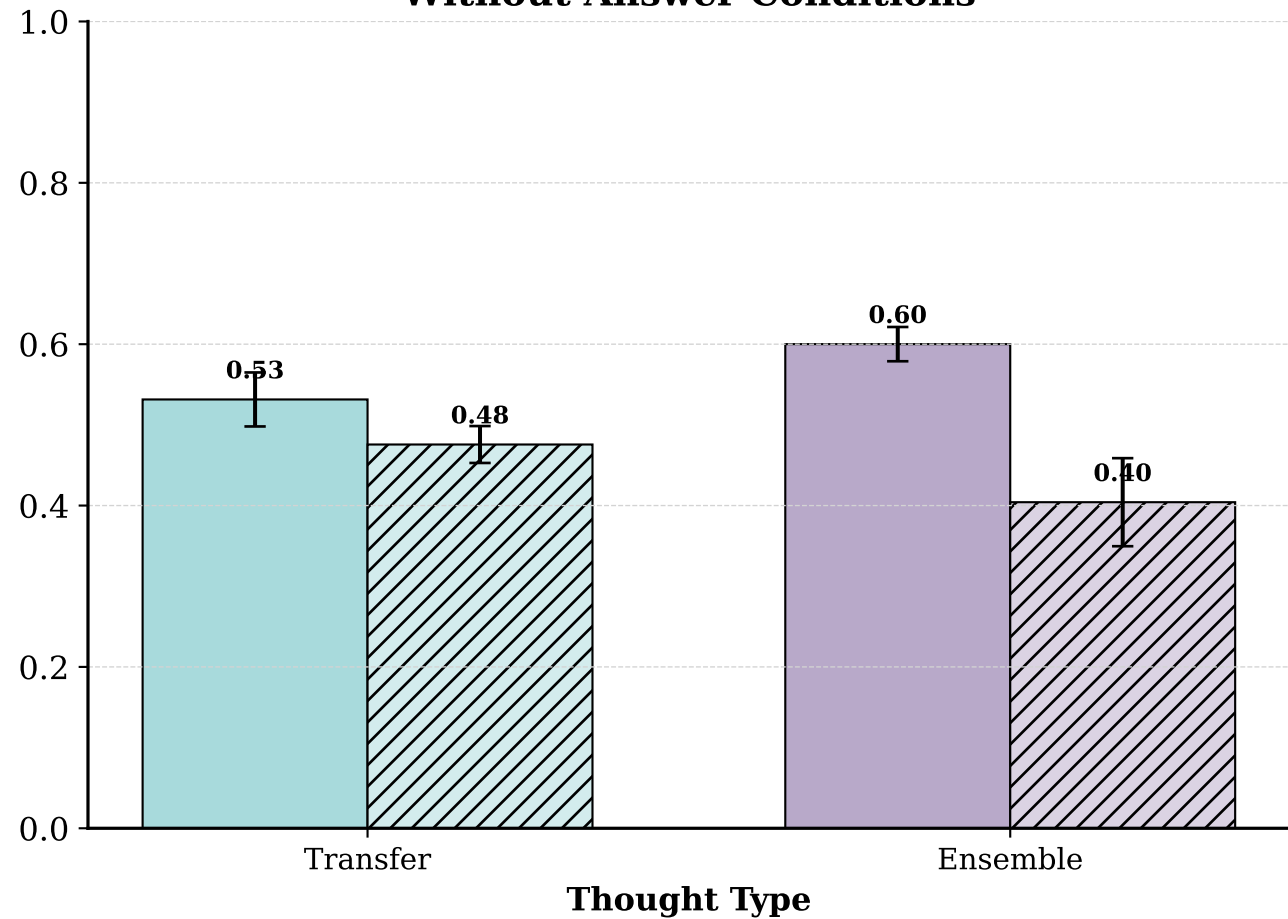

Source Model in Comparison    Source Model Not in Comparison
