# Supplementary material
Source: ML conference proceedings conference paper supplement (https://openreview.net/forum?id=N6ZYsmzMDQ)

Average Consistency Across All Thought Variations

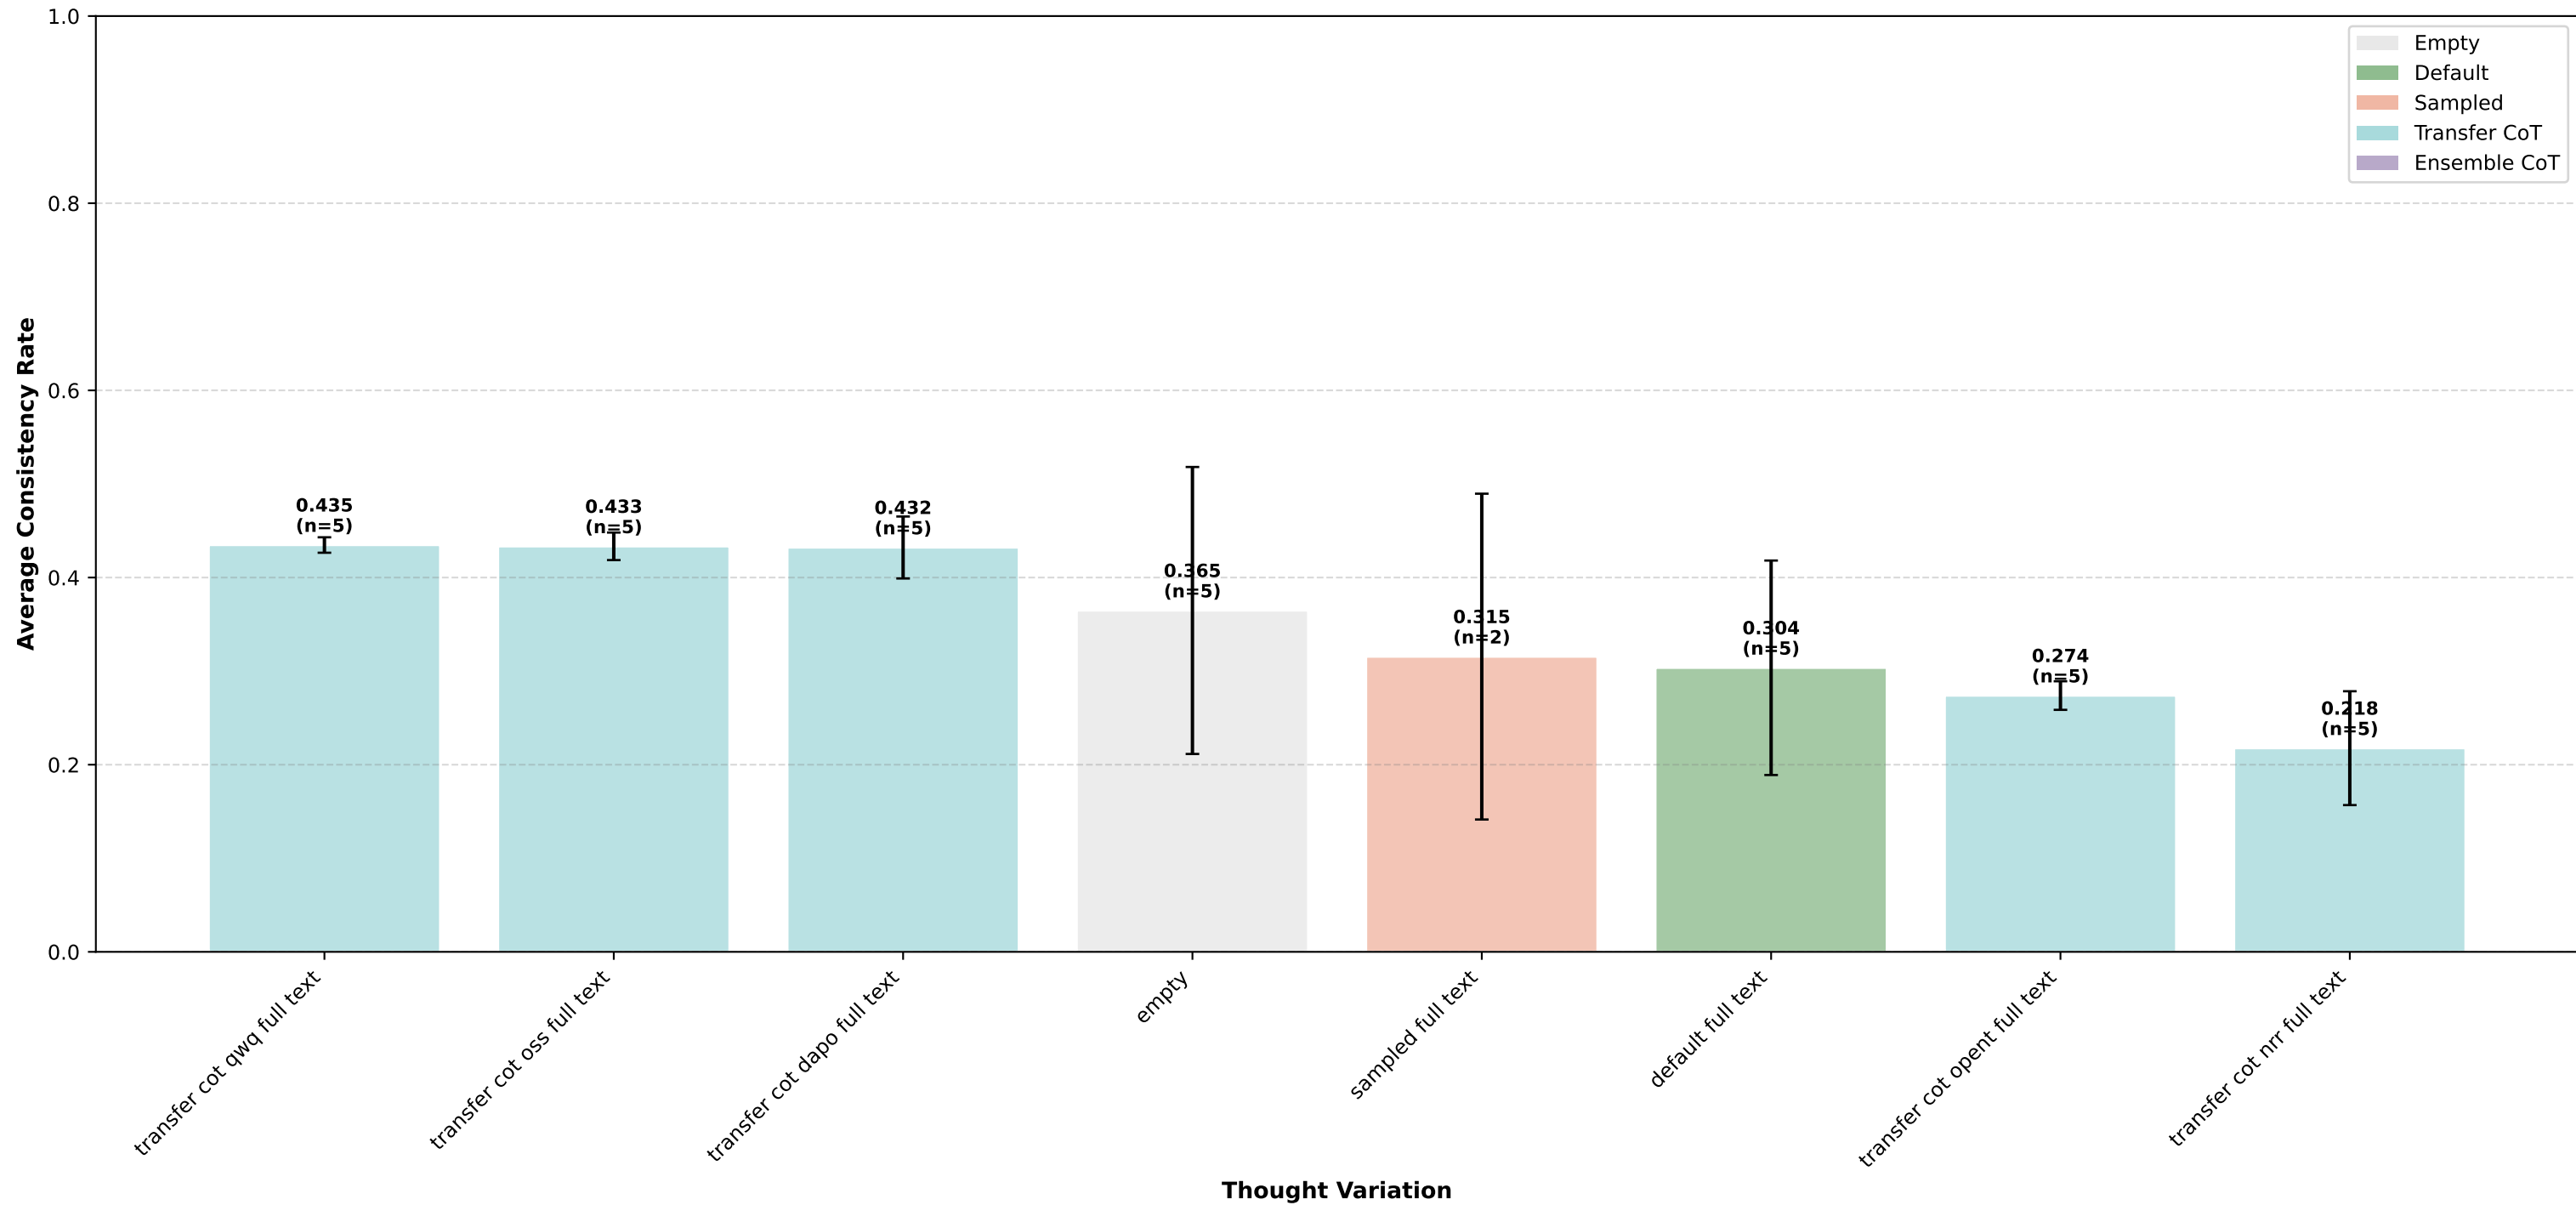

Supplement: supplementary_material [file thought_variation_comparison-checkpoint.pdf › anon_code/evaluation/notebooks/.ipynb_checkpoints/thought_variation_comparison-checkpoint.pdf]
