# Supplementary material
Source: ML conference proceedings conference paper supplement (https://openreview.net/forum?id=N6ZYsmzMDQ)

# Clarity of Steps

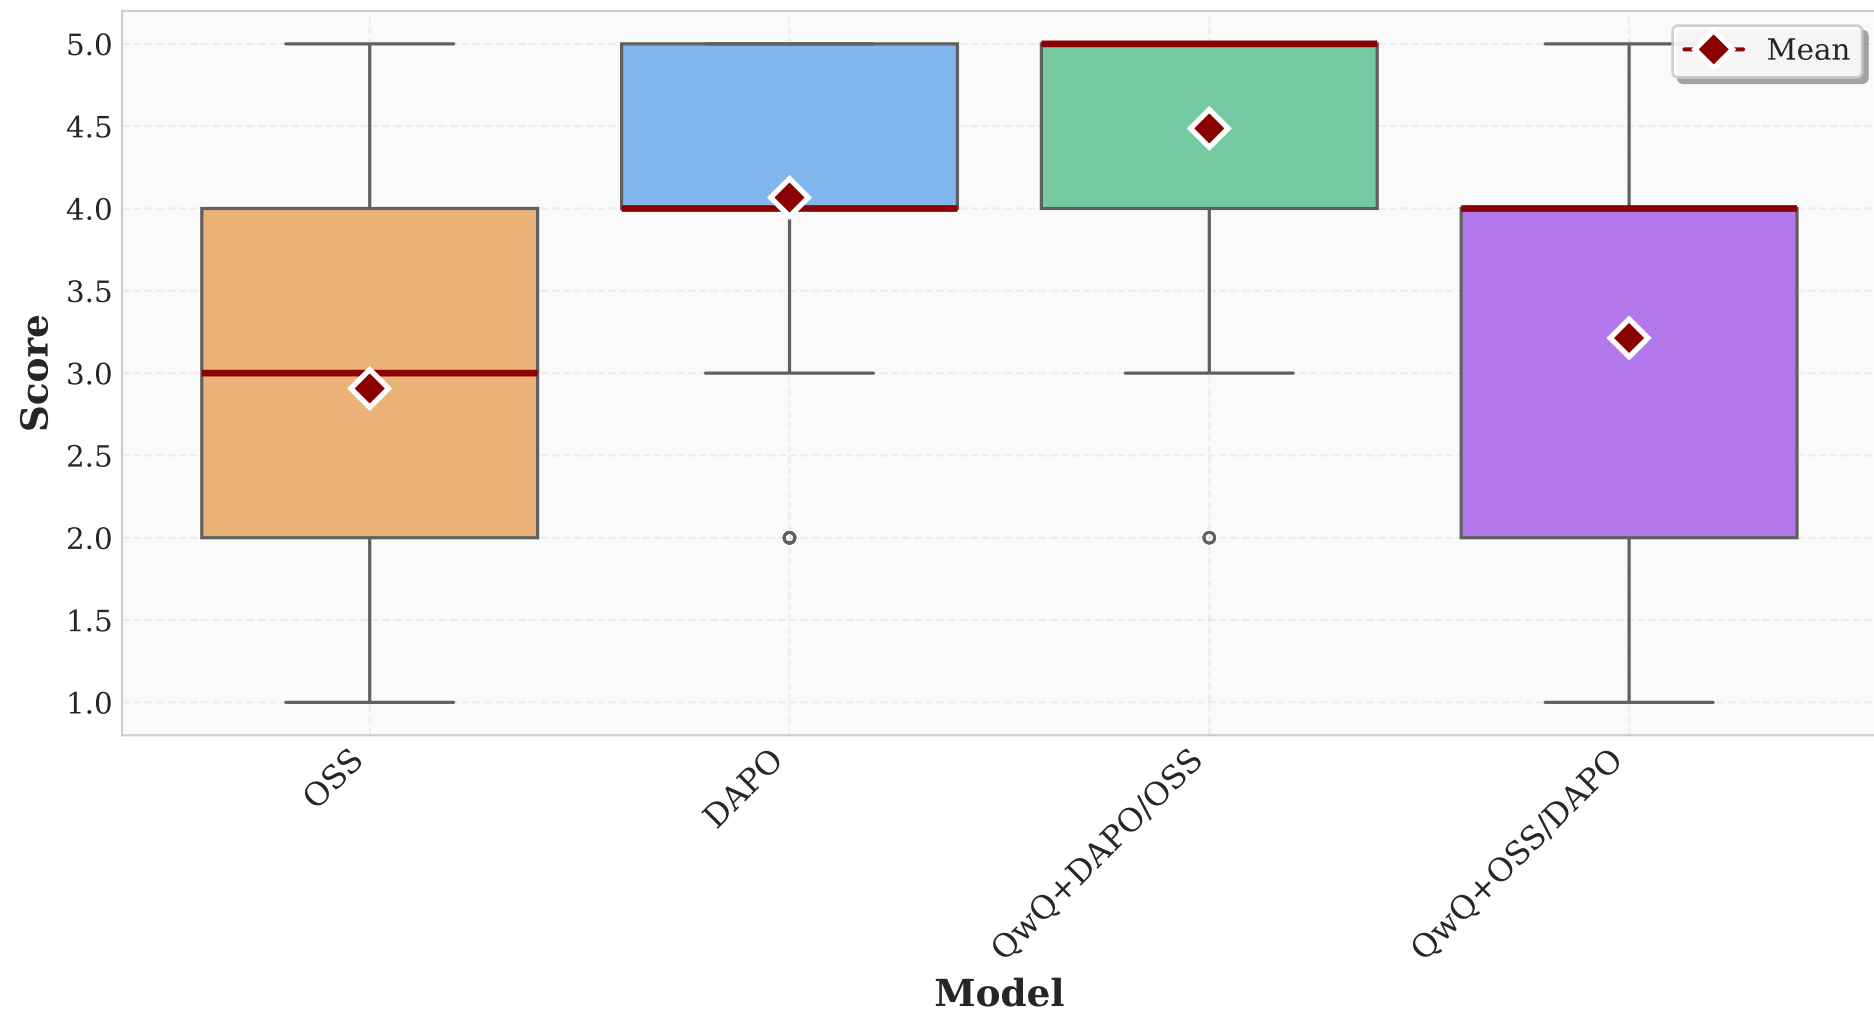

Supplement: supplementary_material [file boxplot_Clarity_of_Steps_all_rows.pdf › anon_code/evaluation/plots_enhanced_user_study/boxplot_Clarity_of_Steps_all_rows.pdf]

# Confidence

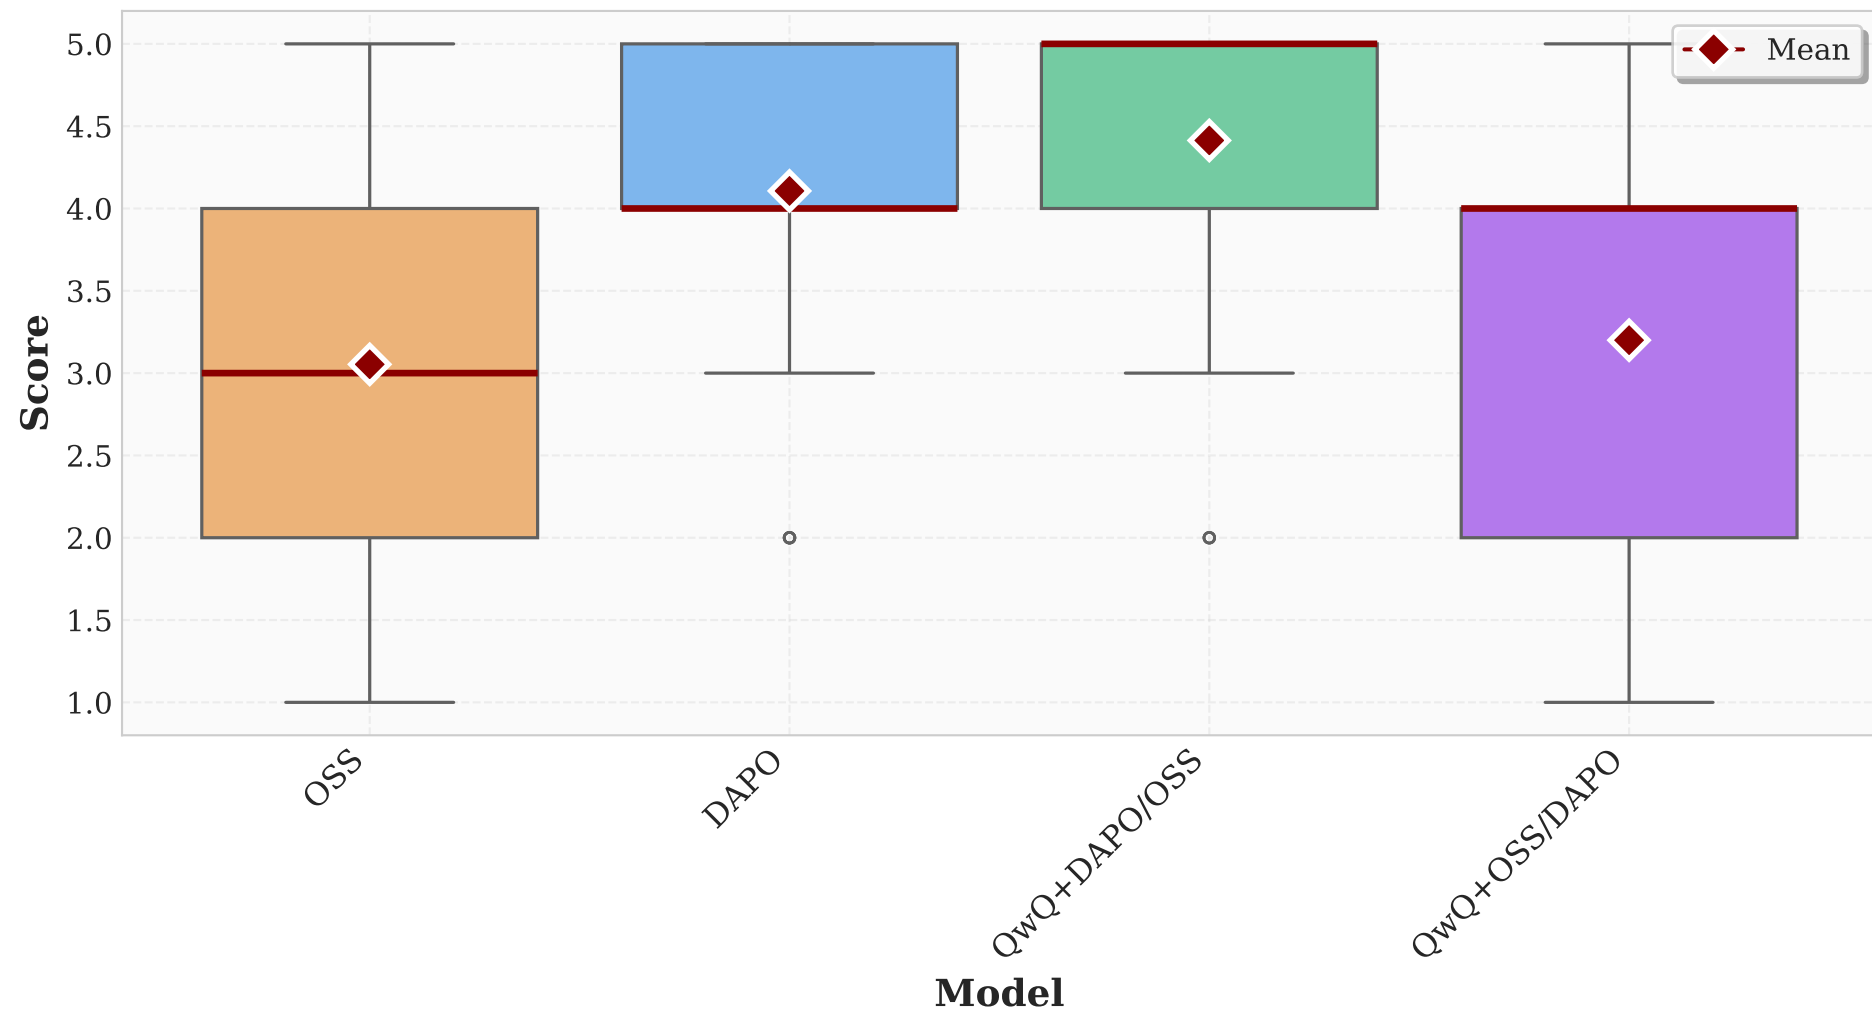

Supplement: supplementary_material [file boxplot_Confidence_all_rows.pdf › anon_code/evaluation/plots_enhanced_user_study/boxplot_Confidence_all_rows.pdf]

# Ease of Following

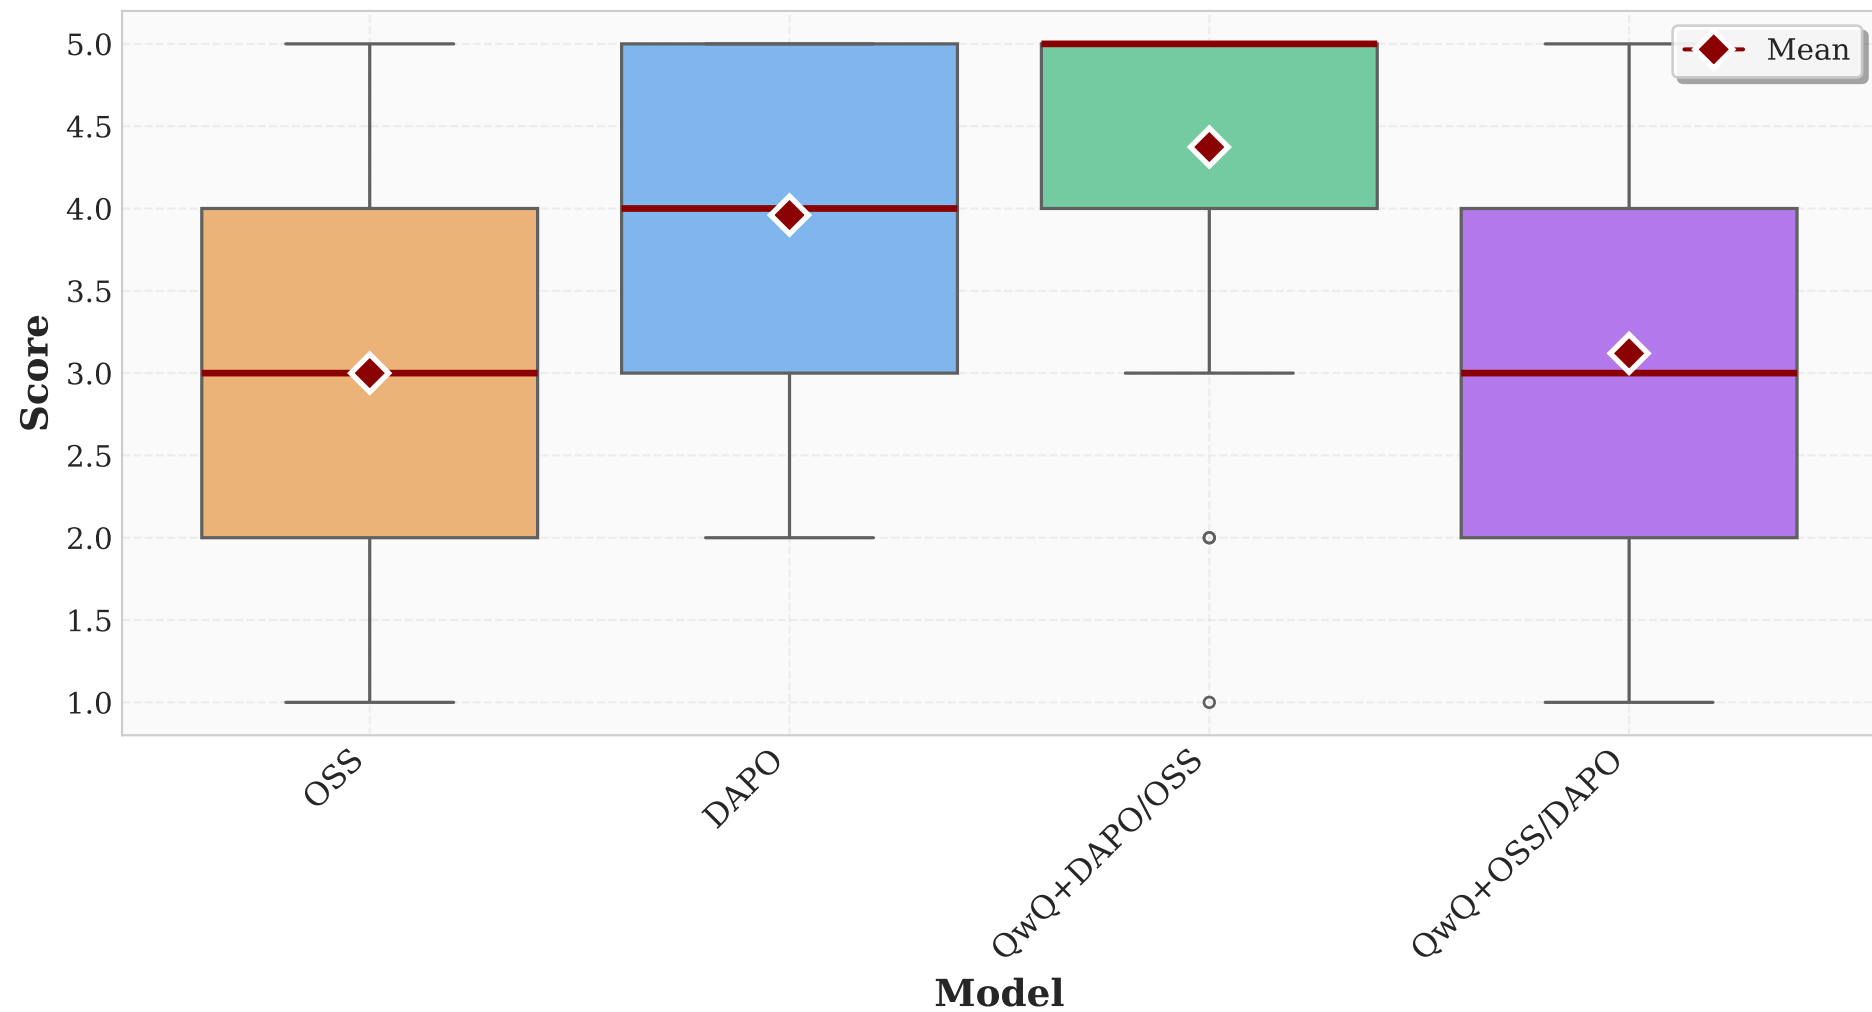

Supplement: supplementary_material [file boxplot_Ease_of_Following_all_rows.pdf › anon_code/evaluation/plots_enhanced_user_study/boxplot_Ease_of_Following_all_rows.pdf]

# Best Overall Model Ranking

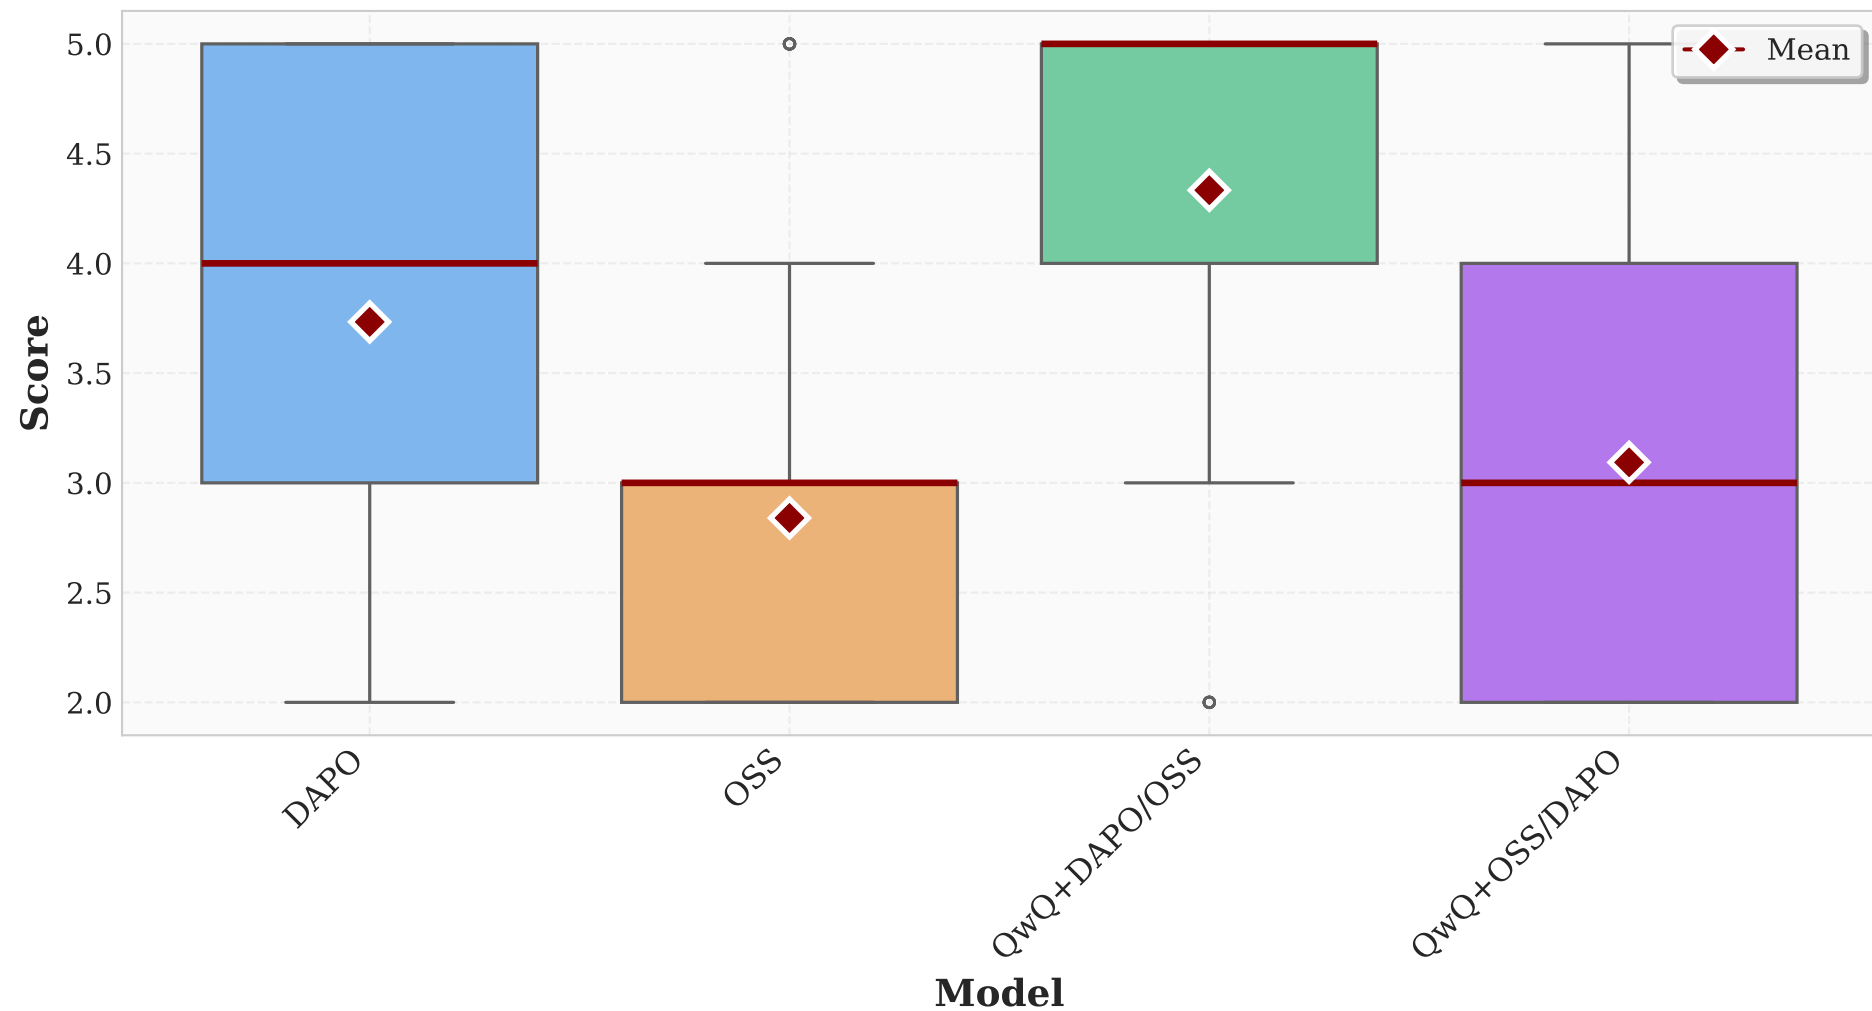

Supplement: supplementary_material [file boxplot_best_overall_all_rows.pdf › anon_code/evaluation/plots_enhanced_user_study/boxplot_best_overall_all_rows.pdf]

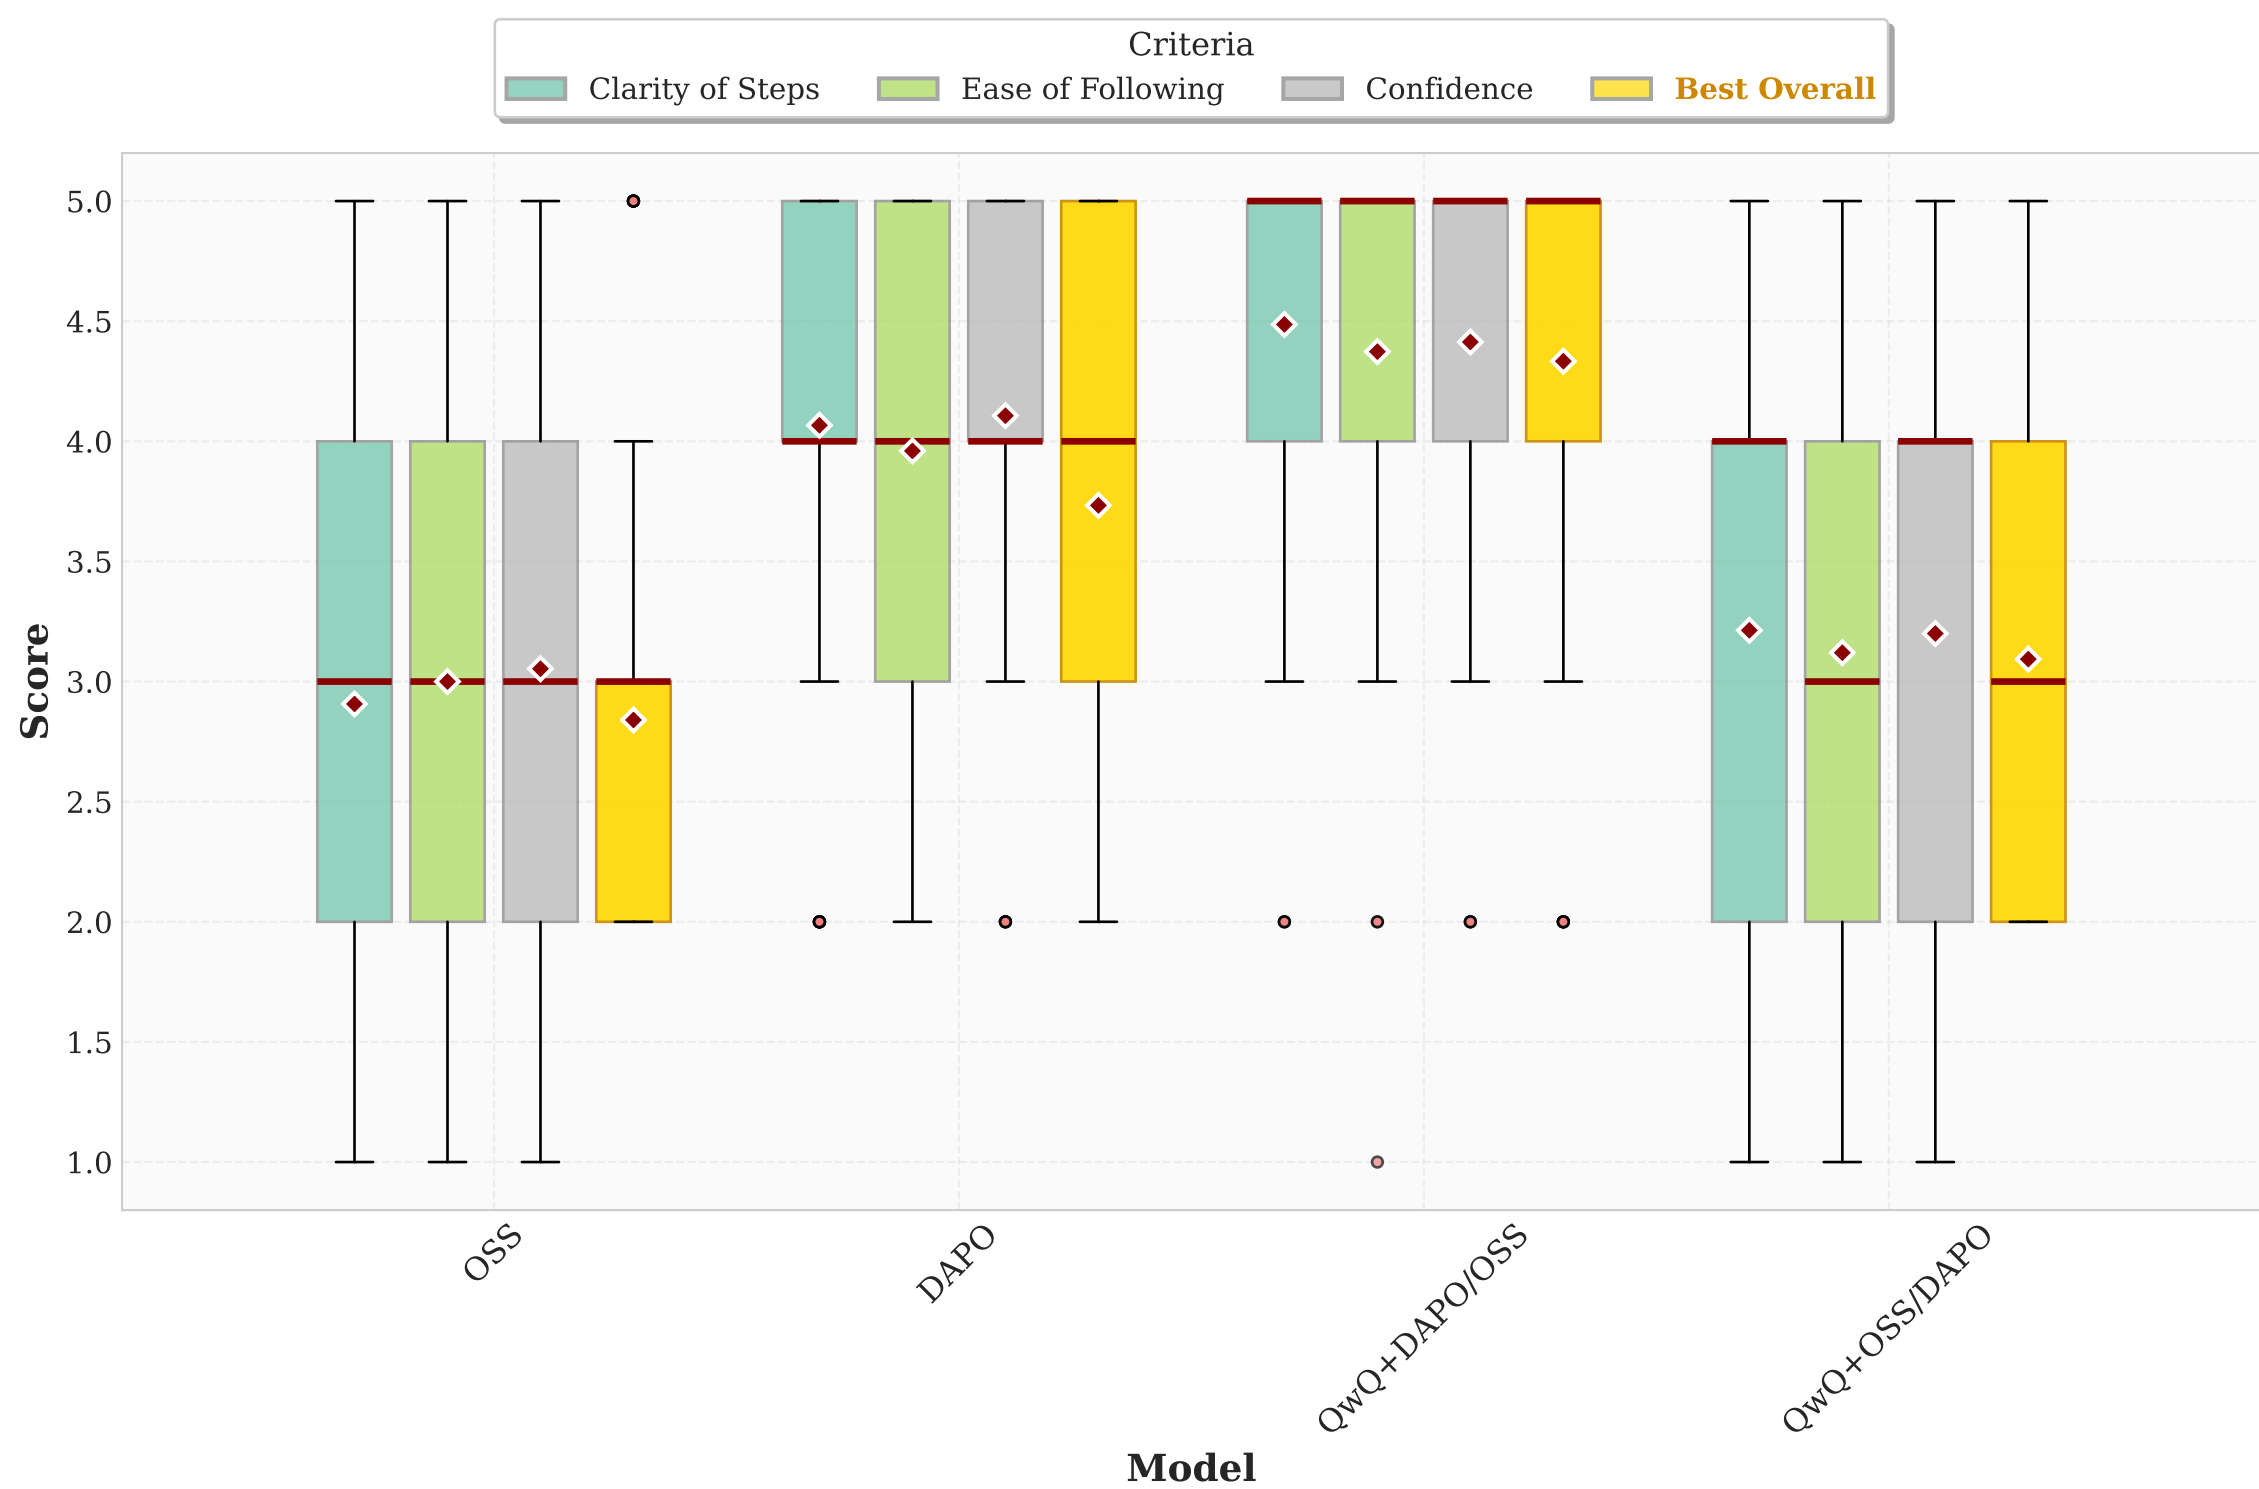

Supplement: supplementary_material [file boxplot_combined_all_rows.pdf › anon_code/evaluation/plots_enhanced_user_study/boxplot_combined_all_rows.pdf]

### Consistency vs User Preference

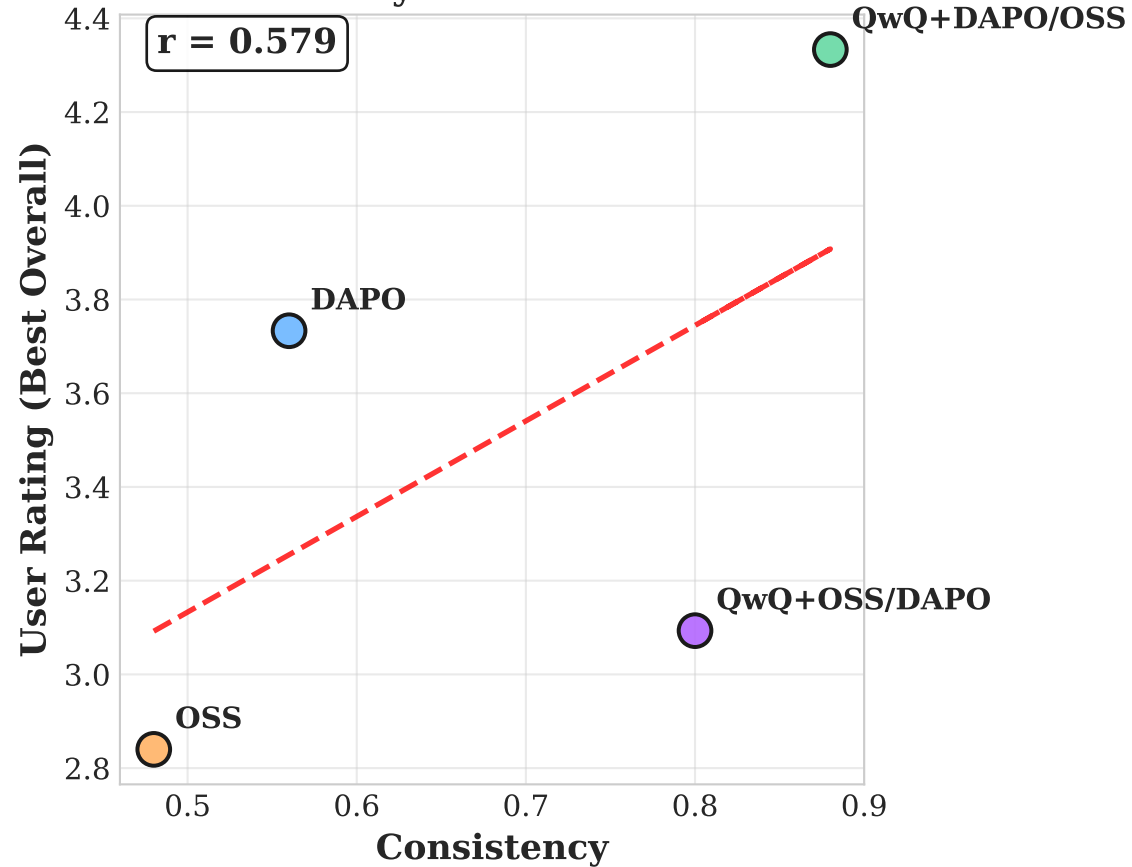

### Accuracy vs User Preference

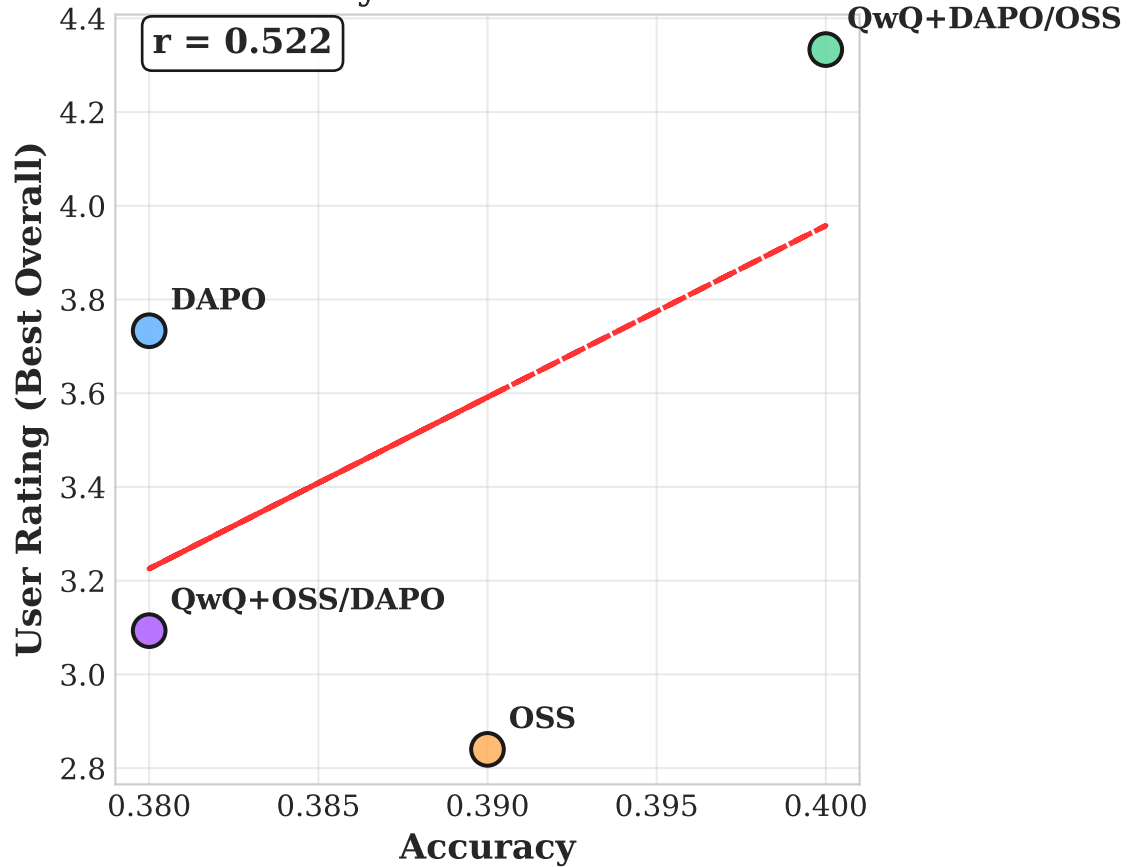

Supplement: supplementary_material [file scatter_plot_all_rows.pdf › anon_code/evaluation/plots_enhanced_user_study/scatter_plot_all_rows.pdf]

# Clarity of Steps



Supplement: supplementary_material [file boxplot_Clarity_of_Steps_all_rows.pdf › anon_code/evaluation/plots_user_study/boxplot_Clarity_of_Steps_all_rows.pdf]

# Confidence

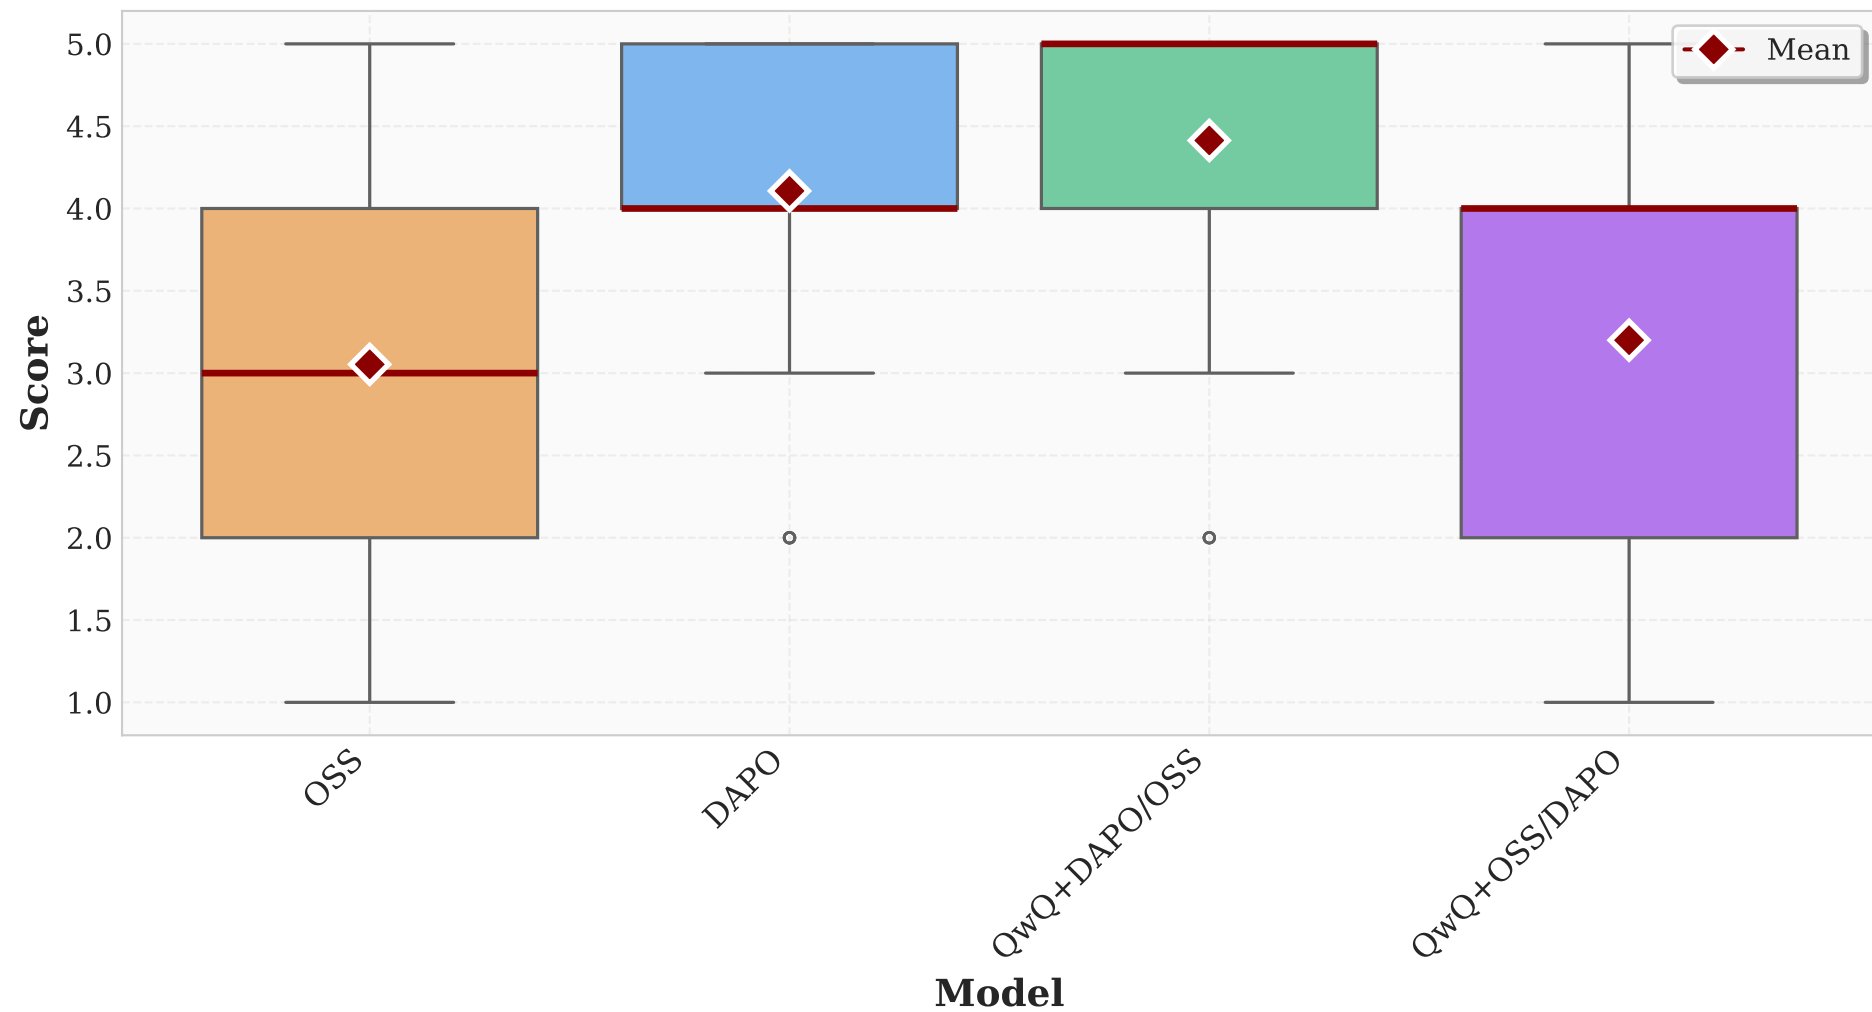

Supplement: supplementary_material [file boxplot_Confidence_all_rows.pdf › anon_code/evaluation/plots_user_study/boxplot_Confidence_all_rows.pdf]

# Ease of Following

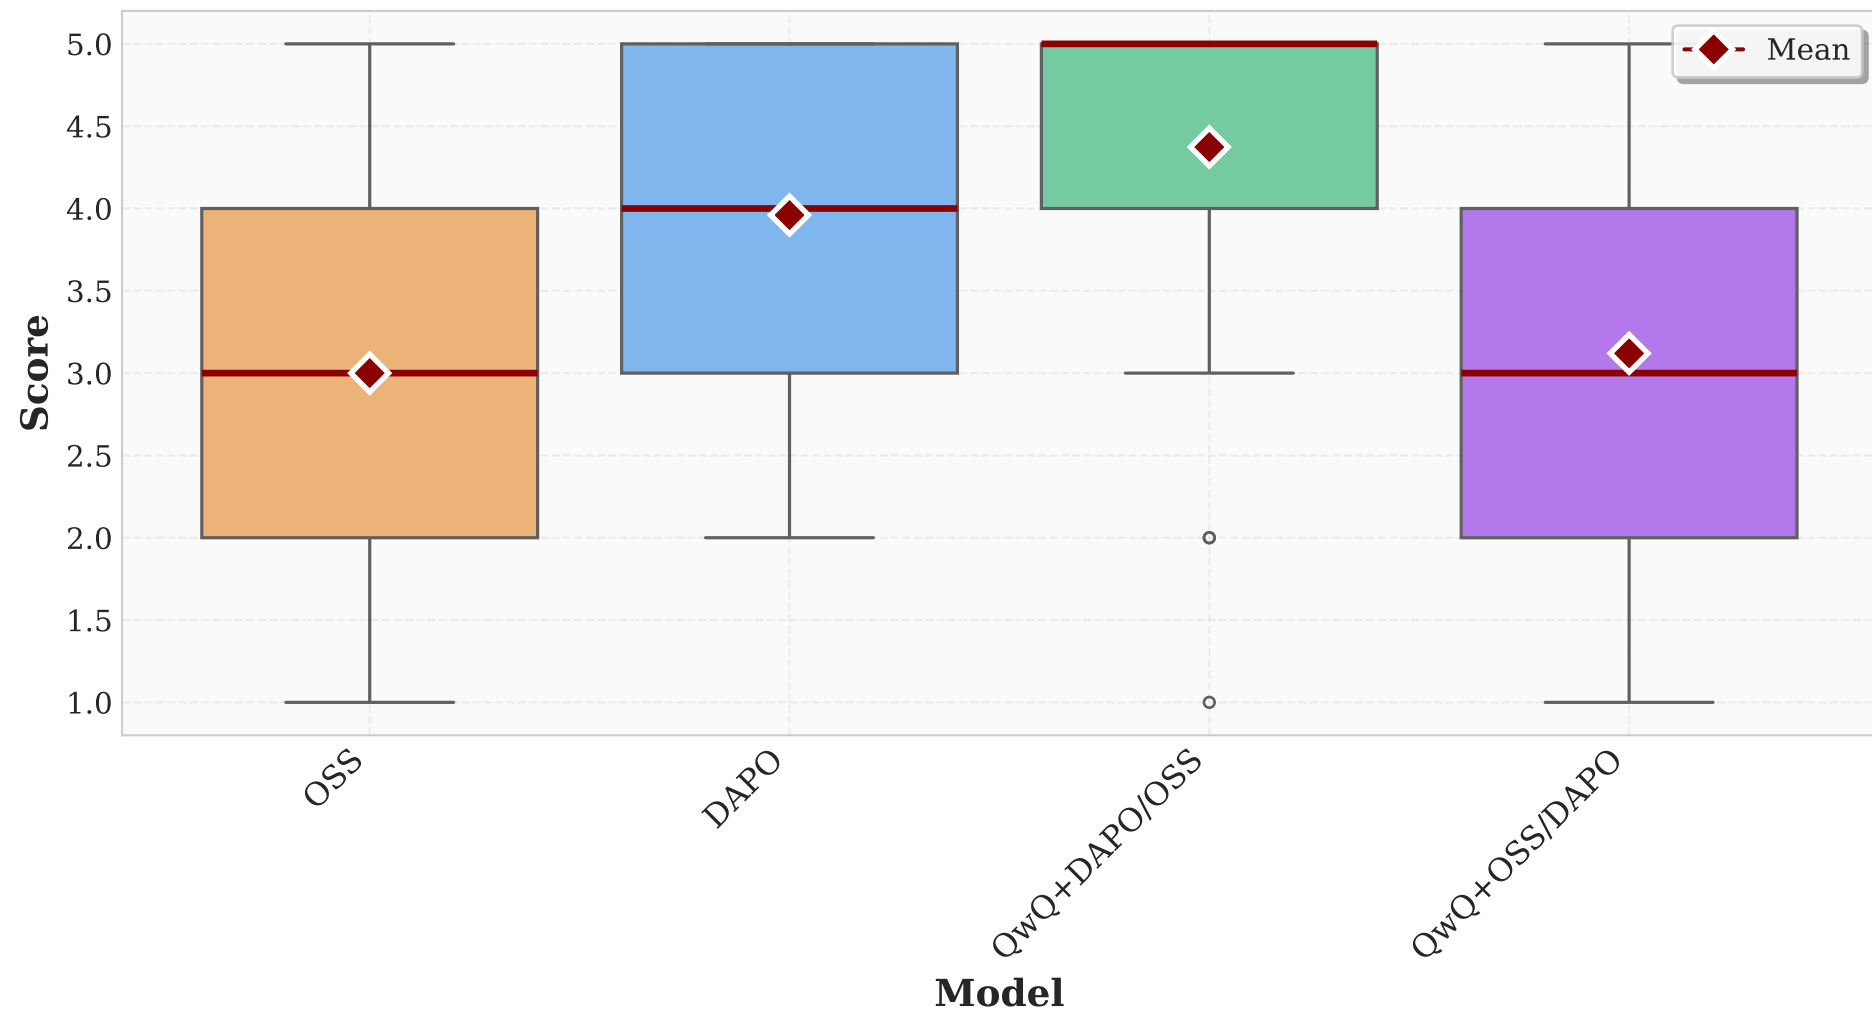

Supplement: supplementary_material [file boxplot_Ease_of_Following_all_rows.pdf › anon_code/evaluation/plots_user_study/boxplot_Ease_of_Following_all_rows.pdf]

# Best Overall Model Ranking



Supplement: supplementary_material [file boxplot_best_overall_all_rows.pdf › anon_code/evaluation/plots_user_study/boxplot_best_overall_all_rows.pdf]



Supplement: supplementary_material [file boxplot_combined_all_rows.pdf › anon_code/evaluation/plots_user_study/boxplot_combined_all_rows.pdf]
